# Supplementary material for: Portable X-ray fluorescence spectrometry: a cost-effective method for analysing trace metals in deposited dust
Source: Royal Society of Chemistry journal article supplement (doi:10.1039/d4ay00368c), 2024-01-01
Supplement: d4ay00368c1.pdf [file d4ay00368c1.pdf]

**Supplementary data for**  
**Portable X-Ray Fluorescence Spectrometry: A Cost-Effective Method for Analysing**  
**Trace Metals in Deposited Dust**

Carlos Ibañez-Del Rivero <sup>a</sup>, Cassandra Wheeler <sup>a</sup>, Kara L. Fry <sup>b</sup>, Mark Patrick Taylor <sup>a, b\*</sup>

<sup>a</sup>School of Natural Sciences, Faculty of Science and Engineering, Macquarie University,  
Sydney, New South Wales, 2109, Australia

<sup>b</sup>Environment Protection Authority Victoria, EPA Science, Centre for Applied Sciences,  
Ernest Jones Drive, Macleod, Melbourne, Victoria, 3085, Australia

**\*Corresponding author:** Mark Patrick Taylor; Email: [mark.taylor@mq.edu.au](mailto:mark.taylor@mq.edu.au)

ORCID numbers:

Carlos Ibañez-Del Rivero: 0000-0003-0783-2523

Cassandra Wheeler: 0000-0003-1285-1681

Kara L Fry: 0000-0001-9103-9186

Mark Patrick Taylor: 0000-0001-7598-9982

**Supplementary Tables – S1 – S6**

**Supplementary Figures – S1 – S6**





**Supplementary Table S2.** Loading as  $\mu\text{g}/\text{sample}$  of trace metal and instrumental LODs of blank wipes detected by ICP-MS analysis for blanks in the different case studies. Blank cells indicate trace metals that were not assessed for that case study.

| <b>Description</b>                 | <b>As</b>                                       | <b>Cr</b> | <b>Cu</b> | <b>Fe</b> | <b>Mn</b> | <b>Ni</b> | <b>Pb</b> | <b>Zn</b> |
|------------------------------------|-------------------------------------------------|-----------|-----------|-----------|-----------|-----------|-----------|-----------|
|                                    | <b>(<math>\mu\text{g}/\text{sample}</math>)</b> |           |           |           |           |           |           |           |
| Tsumeb case study blank A          | < 0.1                                           |           | 0.45      |           |           |           | < 0.05    | 70        |
| Tsumeb case study blank B          | < 0.1                                           |           | 0.62      |           |           |           | < 0.05    | 70        |
| Tsumeb case study laboratory blank | < 0.1                                           |           | 0.64      |           |           |           | < 0.05    | 38        |
| Thio case study blank A            |                                                 | < 0.1     |           | 2.1       | 0.10      | < 0.05    | < 0.05    | 65        |
| Thio case study blank B            |                                                 | < 0.1     |           | 2.6       | 0.16      | < 0.05    | < 0.05    | 55        |
| Noumea case study blank            |                                                 | < 0.1     |           | 2.2       | 0.12      | < 0.05    | < 0.05    | 68        |

**Supplementary Table S3.** Variance for the subset of dust wipes (SDW). The variance presented for each of the samples tested and each test scenario is the mean – variance for As, Cu, Pb and Zn. The row "mean" is the average of all the sample variances for each test scenario. The bold number for "4" tests represents the lowest variance of the 7 test scenarios (the 1<sup>st</sup> scenario consisting of a single test was not included given that it does not produce a variance).

| Sample ID           | Test scenario/ number of tests | Variance           |
|---------------------|--------------------------------|--------------------|
| TD029               | 2 <sup>nd</sup> /2             | 6264.1             |
|                     | 3 <sup>rd</sup> /4             | 3241.9             |
|                     | 4 <sup>th</sup> /6             | 6032.6             |
|                     | 5 <sup>th</sup> /8             | 1592.6             |
|                     | 6 <sup>th</sup> /10            | 2512.8             |
|                     | 7 <sup>th</sup> /12            | 2733.8             |
|                     | TD062                          | 2 <sup>nd</sup> /2 |
| 3 <sup>rd</sup> /4  |                                | 364.6              |
| 4 <sup>th</sup> /6  |                                | 241.0              |
| 5 <sup>th</sup> /8  |                                | 181.3              |
| 6 <sup>th</sup> /10 |                                | 116.9              |
| 7 <sup>th</sup> /12 |                                | 184.8              |
| TD063               |                                | 2 <sup>nd</sup> /2 |
|                     | 3 <sup>rd</sup> /4             | 10.7               |
|                     | 4 <sup>th</sup> /6             | 38.4               |
|                     | 5 <sup>th</sup> /8             | 141.4              |
|                     | 6 <sup>th</sup> /10            | 76.9               |
|                     | 7 <sup>th</sup> /12            | 76.8               |
|                     | TD074                          | 2 <sup>nd</sup> /2 |
| 3 <sup>rd</sup> /4  |                                | 1552.9             |
| 4 <sup>th</sup> /6  |                                | 239.5              |
| 5 <sup>th</sup> /8  |                                | 3518.7             |
| 6 <sup>th</sup> /10 |                                | 277.2              |
| 7 <sup>th</sup> /12 |                                | 97.6               |
| TD085               |                                | 2 <sup>nd</sup> /2 |
|                     | 3 <sup>rd</sup> /4             | 1764.9             |
|                     | 4 <sup>th</sup> /6             | 6708.2             |
|                     | 5 <sup>th</sup> /8             | 7646.9             |
|                     | 6 <sup>th</sup> /10            | 12150.0            |
|                     | 7 <sup>th</sup> /12            | 7700.9             |
|                     | Mean                           |                    |
| 2 <sup>nd</sup> /2  |                                | 1708.4             |
| 3 <sup>rd</sup> /4  |                                | <b>1387.0</b>      |
| 4 <sup>th</sup> /6  |                                | 2651.9             |
| 5 <sup>th</sup> /8  |                                | 2616.2             |
| 6 <sup>th</sup> /10 |                                | 3026.7             |
| 7 <sup>th</sup> /12 |                                | 2158.8             |

**Supplementary Table S4.** Concentrations ( $\mu\text{g}/\text{m}^2$ ) of dust wipes for the Tsumeb case study ( $n = 80$ ). Uncorrected pXRF and ICP-MS columns contain the concentrations obtained using these two methods. Additionally, the ‘Corrected pXRF’ column contains concentrations calculated using the equations derived from linear correlations for each trace metal.

| Sample ID | As               |        |                | Cu               |        |                | Pb               |        |                | Zn               |        |                |
|-----------|------------------|--------|----------------|------------------|--------|----------------|------------------|--------|----------------|------------------|--------|----------------|
|           | Uncorrected pXRF | ICP-MS | Corrected pXRF |
| TD_ON     | 148              | <LOD   | 105            | 80               | 5      | 35             | 109              | 19     | 624            | 880              | 533    | 1216           |
| TD_UN     | 103              |        | 61             | 101              |        | 80             | 40               |        | 85             | 470              |        | 704            |
| TD001     | 778              |        | 557            | 793              |        | 1432           | 86               |        | 378            | 789              |        | 1157           |
| TD002     | 1038             |        | 747            | 640              |        | 1133           | 337              |        | 1979           | 929              |        | 1357           |
| TD003     | 1031             |        | 743            | 504              |        | 867            | 362              |        | 2142           | 832              |        | 1219           |
| TD004     | 626              |        | 445            | 269              |        | 407            | 334              |        | 1964           | 633              |        | 935            |
| TD005     | 235              | 278    | 167            | 213              | 656    | 285            | 51               | 233    | 292            | 486              | 944    | 671            |
| TD006     | 255              |        | 173            | 340              |        | 546            | 112              |        | 540            | 1088             |        | 1582           |
| TD007     | 252              |        | 170            | 231              |        | 334            | 61               |        | 215            | 582              |        | 863            |
| TD008     | 1707             |        | 1239           | 306              |        | 480            | 2647             |        | 16746          | 574              |        | 851            |
| TD009     | 89               | 111    | 63             | 133              | 289    | 103            | 52               | 156    | 295            | 453              | 778    | 626            |
| TD010     | 152              |        | 97             | 161              |        | 198            | 57               |        | 188            | 478              |        | 715            |
| TD012     | 1485             |        | 1076           | 228              |        | 327            | 755              |        | 4655           | 669              |        | 987            |
| TD013     | 5598             |        | 4096           | 519              |        | 897            | 3380             |        | 21438          | 1123             |        | 1633           |
| TD014     | 294              |        | 201            | 300              |        | 469            | 56               |        | 187            | 589              |        | 872            |
| TD015     | 311              |        | 214            | 601              |        | 1056           | 71               |        | 280            | 1375             |        | 1991           |
| TD016     | 606              |        | 430            | 410              |        | 684            | 128              |        | 648            | 636              |        | 940            |
| TD017     | 154              | 101    | 113            | 283              | 233    | 418            | 56               | 122    | 321            | 659              | 122    | 911            |
| TD018     | 496              |        | 350            | 340              |        | 546            | 61               |        | 220            | 453              |        | 680            |
| TD019     | 874              |        | 627            | 1375             |        | 2568           | 99               |        | 459            | 780              |        | 1145           |
| TD020     | 634              |        | 451            | 683              |        | 1217           | 117              |        | 578            | 925              |        | 1351           |
| TD021     | 509              |        | 360            | 70               |        | 20             | 455              |        | 2734           | 435              |        | 654            |
| TD022     | 226              |        | 152            | 258              |        | 387            | 66               |        | 249            | 853              |        | 1248           |
| TD023     | 394              | 311    | 279            | 406              | 800    | 650            | 74               | 256    | 421            | 644              | 256    | 889            |
| TD024     | 277              |        | 189            | 296              |        | 460            | 86               |        | 374            | 576              |        | 855            |
| TD025     | 618              |        | 439            | 569              |        | 994            | 87               |        | 381            | 491              |        | 733            |
| TD026     | 341              |        | 236            | 490              |        | 839            | 60               |        | 213            | 617              |        | 913            |

Supplementary Table S4 Continued.

| Sample ID | As               |        |                | Cu               |        |                | Pb               |        |                | Zn               |        |                |
|-----------|------------------|--------|----------------|------------------|--------|----------------|------------------|--------|----------------|------------------|--------|----------------|
|           | Uncorrected pXRF | ICP-MS | Corrected pXRF |
| TD027     | 2151             |        | 1566           | 2054             |        | 3893           | 239              |        | 1353           | 933              |        | 1362           |
| TD028     | 6167             |        | 4515           | 3676             |        | 7061           | 438              |        | 2626           | 1478             |        | 2138           |
| TD029     | 1055             | 844    | 747            | 1505             | 1667   | 2729           | 74               | 489    | 421            | 384              | 678    | 530            |
| TD030     | 307              |        | 211            | 380              |        | 626            | 55               |        | 176            | 559              |        | 830            |
| TD031     | 382              | 556    | 270            | 443              | 1444   | 721            | 58               | 322    | 332            | 370              | 822    | 511            |
| TD032     | 464              |        | 327            | 362              |        | 589            | 125              |        | 625            | 542              |        | 806            |
| TD033     | 148              | 167    | 105            | 132              | 422    | 132            | 63               | 278    | 360            | 354              | 644    | 489            |
| TD034     | 4054             |        | 2963           | 4424             |        | 8522           | 310              |        | 1811           | 1920             |        | 2766           |
| TD035     | 1824             |        | 1325           | 2510             |        | 4784           | 156              |        | 821            | 875              |        | 1280           |
| TD036     | 3514             |        | 2566           | 1769             |        | 3338           | 230              |        | 1297           | 965              |        | 1408           |
| TD037     | 677              |        | 483            | 724              |        | 1296           | 135              |        | 687            | 449              |        | 674            |
| TD038     | 9613             |        | 7045           | 2898             |        | 5542           | 596              |        | 3638           | 1379             |        | 1997           |
| TD039     |                  |        |                | 74               |        | 27             | 55               |        | 181            | 5241             |        | 7489           |
| TD040     | 2379             |        | 1733           | 2185             |        | 4150           | 227              |        | 1279           | 1327             |        | 1923           |
| TD041     | 100              |        | 59             | 88               |        | 55             | 39               |        | 73             | 572              |        | 849            |
| TD042     | 2191             |        | 1594           | 1334             |        | 2487           | 267              |        | 1532           | 31494            |        | 44829          |
| TD043     | 5129             |        | 3752           | 6533             |        | 12641          | 379              |        | 2251           | 2009             |        | 2893           |
| TD044     | 1847             |        | 1342           | 1409             |        | 2633           | 255              |        | 1456           | 1132             |        | 1645           |
| TD046     | 3188             |        | 2327           | 560              |        | 977            | 2106             |        | 13293          | 799              |        | 1171           |
| TD047     | 2869             | 2000   | 2031           | 3459             | 5222   | 6426           | 308              | 1778   | 1754           | 1649             | 2111   | 2278           |
| TD048     | 1625             |        | 1179           | 845              |        | 1532           | 430              |        | 2578           | 886              |        | 1295           |
| TD049     | 5545             |        | 4058           | 7451             |        | 14433          | 479              |        | 2889           | 2446             |        | 3515           |
| TD050     | 248              |        | 167            | 455              |        | 771            | 60               |        | 213            | 766              |        | 1124           |
| TD051     | 964              | 456    | 682            | 1277             | 1222   | 2299           | 114              | 378    | 651            | 788              | 767    | 1089           |
| TD052     | 3766             |        | 2751           | 1004             |        | 1844           | 1218             |        | 7614           | 812              |        | 1190           |
| TD053     | 113              |        | 68             | 166              |        | 206            | 37               |        | 63             | 369              |        | 559            |
| TD055     | 205              |        | 136            | 201              |        | 275            | 43               |        | 103            | 373              |        | 565            |

Supplementary Table S4 Continued.

| Sample ID | As               |        |                | Cu               |        |                | Pb               |        |                | Zn               |        |                |
|-----------|------------------|--------|----------------|------------------|--------|----------------|------------------|--------|----------------|------------------|--------|----------------|
|           | Uncorrected pXRF | ICP-MS | Corrected pXRF |
| TD056     | 607              |        | 432            | 252              |        | 375            | 459              |        | 2759           | 671              |        | 990            |
| TD057     | 476              |        | 335            | 480              |        | 821            | 78               |        | 326            | 730              |        | 1074           |
| TD058     | 1907             |        | 1386           | 2072             |        | 3929           | 210              |        | 1166           | 1295             |        | 1877           |
| TD059     | 1781             | 967    | 1261           | 847              | 1111   | 1486           | 81               | 300    | 463            | 604              | 789    | 835            |
| TD062     | 384              | 77     | 272            | 230              | 256    | 318            | 231              | 1011   | 1315           | 743              | 1000   | 1027           |
| TD063     | 251              | 244    | 177            | 292              | 611    | 436            | 72               | 267    | 412            | 519              | 744    | 717            |
| TD064     | 180              |        | 117            | 413              |        | 689            | 81               |        | 344            | 859              |        | 1257           |
| TD066     | 248              | 156    | 175            | 374              | 456    | 590            | 89               | 300    | 510            | 850              | 1111   | 1175           |
| TD067     |                  |        |                | 74               |        | 28             | 40               |        | 81             | 376              |        | 569            |
| TD068     | 354              | 74     | 251            | 457              | 200    | 748            | 97               | 111    | 552            | 968              | 644    | 1338           |
| TD069     | <LOD             | 244    | <LOD           | 86               | 700    | 45             | 51               | 456    | 290            | 476              | 1333   | 658            |
| TD070     | 684              | 478    | 484            | 432              | 1078   | 700            | 149              | 689    | 847            | 909              | 1556   | 1255           |
| TD072     | 313              |        | 215            | 261              |        | 392            | 180              |        | 978            | 656              |        | 969            |
| TD074     | 246              | 278    | 174            | 426              | 922    | 688            | 88               | 444    | 501            | 957              | 1444   | 1321           |
| TD075     | <LOD             |        | <LOD           | 938              |        | 1715           | 59               |        | 204            | 688              |        | 1014           |
| TD076     | 257              | 99     | 182            | 239              | 233    | 335            | 116              | 311    | 663            | 978              | 978    | 1351           |
| TD078     | <LOD             | 62     | <LOD           | <LOD             | 109    |                | 80               | 244    | 457            | 943              | 1011   | 1303           |
| TD080     |                  |        |                | 119              |        | 115            | 66               |        | 249            | 1081             |        | 1573           |
| TD081     | 2889             |        | 2107           | 1877             |        | 3548           | 178              |        | 968            | 967              |        | 1411           |
| TD082     | 447              |        | 314            | 156              |        | 188            | 198              |        | 1090           | 817              |        | 1197           |
| TD084     | 248              | 93     | 175            | 57               | 222    | -10            | 278              | 1444   | 1586           | 712              | 1067   | 984            |
| TD085     | 7877             | 5667   | 5575           | 6555             | 13333  | 12283          | 965              | 5889   | 5505           | 3257             | 4889   | 4500           |
| TD086     | 2661             |        | 1940           | 2608             |        | 4976           | 324              |        | 1898           | 2100             |        | 3022           |
| TD088     | 908              |        | 652            | 674              |        | 1198           | 214              |        | 1195           | 834              |        | 1221           |
| TD089     |                  |        |                | 152              |        | 180            | 35               |        | 53             | 435              |        | 654            |
| TD091     | 133              | 100    | 94             | 189              | 544    | 241            | 108              | 878    | 615            | 578              | 1222   | 798            |



**Supplementary Table S5.** Concentrations ( $\mu\text{g}/\text{m}^2$ ) of dust wipes for the Noumea case study ( $n = **$ ). Uncorrected pXRF and ICP-MS columns contain the concentrations obtained using these two methods. Additionally, the Corrected pXRF column contains concentrations calculated using the equations derived from linear correlations for each trace metal.

| Sample ID | Cr   |        |                | Fe     |        |                | Mn   |        |                | Ni    |        |                | Pb   |        |                | Zn   |        |                |
|-----------|------|--------|----------------|--------|--------|----------------|------|--------|----------------|-------|--------|----------------|------|--------|----------------|------|--------|----------------|
|           | pXRF | ICP-MS | Corrected pXRF | pXRF   | ICP-MS | Corrected pXRF | pXRF | ICP-MS | Corrected pXRF | pXRF  | ICP-MS | Corrected pXRF | pXRF | ICP-MS | Corrected pXRF | pXRF | ICP-MS | Corrected pXRF |
| ND_01     | 167  |        | 116            | 5872   |        | 3527           | 386  |        | 159            | 222   |        | 161            | 33   |        | 32             | 456  |        | 349            |
| ND_02     | 189  |        | 131            | 10378  |        | 6233           | 511  |        | 210            | 133   |        | 96             | 44   |        | 43             | 608  |        | 465            |
| ND_03     | 136  |        | 95             | 6047   |        | 3632           | 361  |        | 149            |       |        |                | 37   |        | 36             | 472  |        | 361            |
| ND_04     | 153  |        | 106            | 7036   |        | 4226           | 406  |        | 167            |       |        |                | 39   |        | 37             | 486  |        | 372            |
| ND_05     | 150  |        | 104            | 9559   |        | 5741           | 406  |        | 167            | 217   |        | 157            | 38   |        | 36             | 394  |        | 301            |
| ND_06     | 259  |        | 180            | 16397  |        | 9848           | 566  |        | 233            | 197   |        | 142            | 50   |        | 48             | 653  |        | 500            |
| ND_07     | 211  |        | 147            | 10708  |        | 6431           | 528  |        | 217            | 228   |        | 165            | 39   |        | 37             | 339  |        | 259            |
| ND_08     | 239  |        | 166            | 11589  |        | 6960           | 506  |        | 208            | 403   |        | 291            | 44   |        | 43             | 733  |        | 561            |
| ND_09     | 222  | 92     | 155            | 13522  | 17111  | 8121           | 489  | 144    | 201            |       | 289    |                | 33   | 31     | 32             | 619  | 500    | 474            |
| ND_10     | 400  |        | 278            | 12556  |        | 7541           | 838  |        | 344            | 278   |        | 201            | 42   |        | 40             | 863  |        | 660            |
| ND_11     | 469  |        | 326            | 34266  |        | 20580          | 903  |        | 371            | 900   |        | 651            | 50   |        | 48             | 803  |        | 615            |
| ND_12     | 481  |        | 335            | 18497  |        | 11109          | 806  |        | 332            | 1772  |        | 1281           | 50   |        | 48             | 678  |        | 519            |
| ND_13     | 800  |        | 556            | 45541  |        | 27352          | 1253 |        | 515            | 2684  |        | 1940           | 63   |        | 60             | 991  |        | 758            |
| ND_14     | 400  |        | 278            | 35525  |        | 21336          | 708  |        | 291            | 947   |        | 685            | 100  |        | 96             | 686  |        | 525            |
| ND_15     | 1092 |        | 759            | 128406 |        | 77120          | 2964 |        | 1219           | 1375  |        | 994            | 50   |        | 48             | 1153 |        | 882            |
| ND_16     | 666  |        | 463            | 51931  |        | 31190          | 1197 |        | 492            | 2169  |        | 1568           | 50   |        | 48             | 1063 |        | 813            |
| ND_17     | 456  |        | 317            | 12313  |        | 7395           | 909  |        | 374            | 403   |        | 291            | 69   |        | 66             | 603  |        | 462            |
| ND_18     | 672  |        | 467            | 43269  |        | 25987          | 1256 |        | 517            | 1213  |        | 876            | 50   |        | 48             | 859  |        | 658            |
| ND_19     | 347  | 122    | 241            | 16097  | 11333  | 9668           | 614  | 189    | 252            | 1619  | 1333   | 1171           | 33   | 7      | 32             | 419  | 444    | 321            |
| ND_21     | 375  |        | 261            | 35716  |        | 21451          | 631  |        | 260            | 1656  |        | 1197           | 50   |        | 48             | 606  |        | 464            |
| ND_22     | 1788 | 1025   | 1243           | 109725 | 82125  | 65901          | 2100 | 1500   | 864            | 10147 | 8875   | 7334           | 63   | 56     | 60             | 2266 | 2000   | 1734           |
| ND_23     | 1016 |        | 706            | 74747  |        | 44893          | 1306 |        | 537            | 6013  |        | 4346           | 63   |        | 60             | 2041 |        | 1561           |
| ND_24     | 503  |        | 350            | 25256  |        | 15169          | 691  |        | 284            | 2094  |        | 1513           | 38   |        | 36             | 616  |        | 471            |

Supplementary Table S5 (continued)

| Sample ID | Cr   |        |                | Fe     |        |                | Mn   |        |                | Ni   |        |                | Pb   |        |                | Zn   |        |                |
|-----------|------|--------|----------------|--------|--------|----------------|------|--------|----------------|------|--------|----------------|------|--------|----------------|------|--------|----------------|
|           | pXRF | ICP-MS | Corrected pXRF | pXRF   | ICP-MS | Corrected pXRF | pXRF | ICP-MS | Corrected pXRF | pXRF | ICP-MS | Corrected pXRF | pXRF | ICP-MS | Corrected pXRF | pXRF | ICP-MS | Corrected pXRF |
| ND_25     | 434  | 300    | 302            | 27359  | 26375  | 16432          | 600  | 325    | 247            | 2819 | 2875   | 2037           | 46   | 24     | 44             | 688  | 688    | 526            |
| ND_26     | 1544 |        | 1074           | 156425 |        | 93949          | 2119 |        | 872            | 3269 |        | 2363           | 103  |        | 99             | 2975 |        | 2276           |
| ND_27     | 394  |        | 274            | 45806  |        | 27511          | 828  |        | 340            | 1244 |        | 899            | 39   |        | 37             | 5689 |        | 4353           |
| ND_28     | 1364 |        | 948            | 111603 |        | 67029          | 2356 |        | 969            | 1819 |        | 1315           | 133  |        | 129            | 2297 |        | 1758           |
| ND_29     | 536  |        | 373            | 88086  |        | 52905          | 1256 |        | 516            | 583  |        | 422            | 2381 |        | 2295           | 1308 |        | 1001           |
| ND_30     | 1572 |        | 1093           | 133233 |        | 80020          | 2031 |        | 835            | 2544 |        | 1839           | 119  |        | 115            | 4469 |        | 3420           |
| ND_31     | 241  |        | 167            | 11197  |        | 6725           | 547  |        | 225            | 175  |        | 126            | 46   |        | 44             | 441  |        | 337            |
| ND_32     | 297  |        | 206            | 24966  |        | 14994          | 503  |        | 207            | 1184 |        | 856            | 38   |        | 36             | 553  |        | 423            |
| ND_33     | 275  |        | 191            | 19042  |        | 11436          | 531  |        | 218            | 1086 |        | 785            | 50   |        | 48             | 561  |        | 429            |
| ND_34     | 403  |        | 280            | 25397  |        | 15254          | 847  |        | 348            | 1411 |        | 1020           | 44   |        | 43             | 600  |        | 459            |
| ND_35     | 700  |        | 487            | 55834  |        | 33534          | 981  |        | 404            | 3028 |        | 2189           | 97   |        | 93             | 2153 |        | 1648           |
| ND_37     | 847  | 467    | 589            | 81467  | 63556  | 48929          | 1553 | 1078   | 639            | 3664 | 3556   | 2648           | 41   | 17     | 39             | 611  | 711    | 468            |
| ND_38     | 513  |        | 356            | 20878  |        | 12539          | 653  |        | 269            | 1519 |        | 1098           | 44   |        | 42             | 734  |        | 562            |
| ND_39     | 447  |        | 311            | 25172  |        | 15118          | 734  |        | 302            | 1691 |        | 1222           | 50   |        | 48             | 750  |        | 574            |
| ND_40     | 544  |        | 379            | 53089  |        | 31885          | 997  |        | 410            | 3481 |        | 2516           | 36   |        | 35             | 986  |        | 755            |
| ND_41     | 381  |        | 265            | 30831  |        | 18517          | 608  |        | 250            | 1525 |        | 1102           | 44   |        | 43             | 633  |        | 485            |
| ND_42     | 494  |        | 343            | 26084  |        | 15666          | 809  |        | 333            | 1113 |        | 804            | 41   |        | 39             | 1044 |        | 799            |
| ND_45     | 208  |        | 145            | 17167  |        | 10310          | 433  |        | 178            | 786  |        | 568            | 44   |        | 43             | 414  |        | 317            |
| ND_47     | 844  |        | 587            | 60639  |        | 36420          | 1192 |        | 490            | 4517 |        | 3265           | 53   |        | 51             | 2192 |        | 1677           |
| ND_48     | 211  | 100    | 147            | 17972  | 17778  | 10794          | 492  | 233    | 202            | 189  | 422    | 137            | 28   | 9      | 27             | 2106 | 1889   | 1611           |
| ND_49     | 234  |        | 163            | 15319  |        | 9200           | 503  |        | 207            | 575  |        | 416            | 38   |        | 36             | 509  |        | 390            |
| ND_50     | 103  |        | 72             | 6341   |        | 3808           | 328  |        | 135            | 328  |        | 237            | 38   |        | 36             | 156  |        | 120            |
| ND_51     | 1459 |        | 1015           | 152038 |        | 91314          | 2003 |        | 824            | 6225 |        | 4499           | 206  |        | 199            | 5606 |        | 4290           |
| ND_52     | 259  |        | 180            | 19388  |        | 11644          | 531  |        | 219            | 997  |        | 721            | 75   |        | 72             | 3488 |        | 2669           |
| ND_53     | 209  |        | 146            | 13703  |        | 8230           | 403  |        | 166            | 479  |        | 346            | 38   |        | 36             | 2313 |        | 1770           |
| ND_55     | 278  |        | 193            | 17844  |        | 10717          | 628  |        | 258            | 334  |        | 242            | 56   |        | 54             | 1509 |        | 1155           |

Supplementary Table S5 (continued)

| Sample ID | Cr   |        |                | Fe     |        |                | Mn   |        |                | Ni   |        |                | Pb   |        |                | Zn   |        |                |
|-----------|------|--------|----------------|--------|--------|----------------|------|--------|----------------|------|--------|----------------|------|--------|----------------|------|--------|----------------|
|           | pXRF | ICP-MS | Corrected pXRF | pXRF   | ICP-MS | Corrected pXRF | pXRF | ICP-MS | Corrected pXRF | pXRF | ICP-MS | Corrected pXRF | pXRF | ICP-MS | Corrected pXRF | pXRF | ICP-MS | Corrected pXRF |
| ND_56     | 484  | 394    | 337            | 35541  | 47531  | 21346          | 731  | 689    | 301            | 2769 | 3656   | 2001           | 50   | 689    | 48             | 1884 | 2672   | 1442           |
| ND_57     | 489  |        | 340            | 48356  |        | 29042          | 1064 |        | 438            | 878  |        | 634            | 52   |        | 50             | 1936 |        | 1482           |
| ND_58     | 414  |        | 288            | 31794  |        | 19096          | 728  |        | 299            | 1208 |        | 873            | 39   |        | 37             | 1803 |        | 1379           |
| ND_59     | 319  |        | 222            | 22461  |        | 13490          | 642  |        | 264            | 894  |        | 647            | 41   |        | 39             | 1989 |        | 1522           |
| ND_60     | 517  | 375    | 359            | 30986  | 29531  | 18610          | 669  | 365    | 275            | 728  | 761    | 526            | 44   | 39     | 43             | 2106 | 1679   | 1611           |
| ND_61     | 225  |        | 156            | 10461  |        | 6283           | 433  |        | 178            | 378  |        | 273            | 33   |        | 32             | 1128 |        | 863            |
| ND_62     | 461  | 167    | 321            | 26908  | 20111  | 16161          | 794  | 333    | 327            | 1275 | 1056   | 922            | 0    | 9      |                | 2061 | 1667   | 1577           |
| ND_63     | 425  |        | 296            | 41913  |        | 25173          | 966  |        | 397            | 1913 |        | 1382           | 25   |        | 24             | 1881 |        | 1440           |
| ND_64     | 528  |        | 367            | 45322  |        | 27220          | 1069 |        | 440            | 2438 |        | 1762           | 50   |        | 48             | 1503 |        | 1150           |
| ND_65     | 381  |        | 265            | 34938  |        | 20983          | 813  |        | 334            | 1803 |        | 1303           | 25   |        | 24             | 1959 |        | 1499           |
| ND_66     | 550  |        | 382            | 42950  |        | 25796          | 931  |        | 383            | 2691 |        | 1945           | 42   |        | 40             | 1594 |        | 1220           |
| ND_67     | 391  |        | 272            | 33872  |        | 20343          | 766  |        | 315            | 1913 |        | 1382           | 44   |        | 42             | 1466 |        | 1121           |
| ND_69     | 169  |        | 118            | 13892  |        | 8343           | 417  |        | 171            | 364  |        | 263            | 22   |        | 21             | 867  |        | 663            |
| ND_70     | 350  |        | 243            | 9209   |        | 5531           | 809  |        | 333            | 406  |        | 294            | 93   |        | 90             | 1521 |        | 1164           |
| ND_71A    | 2211 |        | 1537           | 166547 |        | 100028         | 2922 |        | 1202           | 5572 |        | 4028           | 58   |        | 56             | 3286 |        | 2515           |
| ND_71B    | 1967 |        | 1367           | 156125 |        | 93769          | 2714 |        | 1116           | 5831 |        | 4214           | 64   |        | 62             | 3544 |        | 2712           |
| ND_73     | 258  |        | 180            | 24792  |        | 14890          | 517  |        | 213            | 436  |        | 315            | 64   |        | 62             | 1322 |        | 1012           |
| ND_74     | 528  |        | 367            | 37625  |        | 22598          | 884  |        | 364            | 966  |        | 698            | 84   |        | 81             | 1800 |        | 1377           |
| ND_75     | 383  |        | 267            | 33467  |        | 20100          | 803  |        | 330            | 364  |        | 263            | 50   |        | 48             | 1986 |        | 1520           |
| ND_76     | 1033 |        | 718            | 41481  |        | 24913          | 1131 |        | 465            | 1078 |        | 779            | 33   |        | 32             | 1353 |        | 1035           |
| ND_78     | 316  |        | 219            | 23928  |        | 14371          | 603  |        | 248            | 534  |        | 386            | 38   |        | 36             | 2928 |        | 2241           |
| ND_79     | 456  |        | 317            | 36116  |        | 21691          | 838  |        | 344            | 1875 |        | 1355           | 54   |        | 52             | 1728 |        | 1322           |
| ND_80     | 1468 |        | 1021           | 69174  |        | 41546          | 1405 |        | 578            | 8937 |        | 6460           | 53   |        | 51             | 1668 |        | 1277           |
| ND84      | 2189 | 4638   | 1525           | 110446 | 112632 | 66941          | 2095 | 983    | 866            | 8354 | 6846   | 6053           | 52   | 41     | 51             | 1692 | 1093   | 1033           |
| ND_85     | 1872 | 567    | 1302           | 93978  | 51222  | 56443          | 1964 | 756    | 808            | 9339 | 5667   | 6750           | 44   | 14     | 43             | 1694 | 1111   | 1297           |

**Supplementary Table S5 (continued)**

| Sample ID | Cr   |        |                | Fe     |        |                | Mn   |        |                | Ni   |        |                | Pb   |        |                | Zn    |        |                |
|-----------|------|--------|----------------|--------|--------|----------------|------|--------|----------------|------|--------|----------------|------|--------|----------------|-------|--------|----------------|
|           | pXRF | ICP-MS | Corrected pXRF | pXRF   | ICP-MS | Corrected pXRF | pXRF | ICP-MS | Corrected pXRF | pXRF | ICP-MS | Corrected pXRF | pXRF | ICP-MS | Corrected pXRF | pXRF  | ICP-MS | Corrected pXRF |
| ND_86     | 247  | 31     | 172            | 8628   | 5962   | 5182           | 585  | 55     | 240            | 263  | 173    | 190            | 38   | 4      | 37             | 519   | 325    | 397            |
| ND_87     | 365  | 34     | 254            | 16389  | 6912   | 9843           | 779  | 74     | 321            | 315  | 121    | 227            | 44   | 9      | 42             | 656   | 340    | 502            |
| ND_88     | 591  |        | 411            | 24264  |        | 14573          | 900  |        | 370            | 1368 |        | 989            | 40   |        | 39             | 793   |        | 607            |
| ND_89     | 585  |        | 407            | 36958  |        | 22197          | 1001 |        | 412            | 976  |        | 706            | 33   |        | 32             | 1113  |        | 852            |
| ND_90     | 404  |        | 281            | 30231  |        | 18157          | 921  |        | 379            | 297  |        | 215            | 40   |        | 39             | 800   |        | 612            |
| ND_91     | 806  | 78     | 561            | 49768  | 13617  | 29891          | 1116 | 112    | 459            | 1177 | 443    | 851            | 114  | 84     | 110            | 1004  | 499    | 769            |
| ND_92     | 398  |        | 277            | 14774  |        | 8873           | 836  |        | 344            | 244  |        | 176            | 38   |        | 36             | 807   |        | 618            |
| ND_93     | 812  | 152    | 564            | 43245  | 18103  | 25973          | 1255 | 295    | 516            | 2428 | 1143   | 1755           | 44   | 32     | 42             | 1884  | 1048   | 1442           |
| ND_94     | 474  |        | 330            | 60762  |        | 36494          | 1204 |        | 495            | 426  |        | 308            | 57   |        | 55             | 900   |        | 689            |
| ND_81     | 363  |        | 253            | 17119  |        | 10282          | 672  |        | 276            | 1124 |        | 813            | 30   |        | 29             | 547   |        | 419            |
| ND_82     | 289  |        | 201            | 10156  |        | 6099           | 642  |        | 264            | 1422 |        | 1028           | 37   |        | 36             | 483   |        | 370            |
| ND_83     | 1158 |        | 805            | 110164 |        | 66164          | 2114 |        | 869            | 3261 |        | 2357           | 97   |        | 94             | 3419  |        | 2617           |
| ND_84     | 2189 |        | 1522           | 110446 |        | 66334          | 2095 |        | 862            | 8354 |        | 6038           | 52   |        | 51             | 1692  |        | 1295           |
| ND_100    | 443  | 53     | 308            | 16026  | 8094   | 9625           | 762  | 88     | 313            | 519  | 343    | 375            | 29   | 4      | 28             | 776   | 334    | 594            |
| ND_102    | 1752 | 311    | 1218           | 133815 | 50046  | 80369          | 2226 | 573    | 916            | 4146 | 1672   | 2997           | 77   | 55     | 75             | 13721 | -      |                |
| ND_103    | 852  |        | 592            | 63841  |        | 38343          | 1237 |        | 509            | 4148 |        | 2998           | 57   |        | 55             | 1570  |        | 1202           |
| ND_104    | 810  | 259    | 563            | 93056  | 57856  | 55889          | 1802 | 858    | 741            | 413  | 359    | 298            | 70   | 85     | 67             | 2140  | 1397   | 1638           |
| ND_105    | 708  |        | 492            | 60892  |        | 36572          | 1409 |        | 580            | 631  |        | 456            | 64   |        | 62             | 3403  |        | 2604           |
| ND_106    | 529  |        | 368            | 27045  |        | 16243          | 952  |        | 391            | 1083 |        | 783            | 59   |        | 57             | 1013  |        | 775            |
| ND_107    | 482  |        | 335            | 34165  |        | 20519          | 1038 |        | 427            | 441  |        | 319            | 39   |        | 38             | 1112  |        | 851            |
| ND_108    | 762  | 161    | 530            | 58865  | 28984  | 35354          | 1403 | 403    | 577            | 935  | 604    | 676            | 41   | 20     | 40             | 1094  | 684    | 837            |
| ND_109    | 441  |        | 307            | 29494  |        | 17714          | 944  |        | 388            | 232  |        | 168            | 43   |        | 42             | 1024  |        | 783            |

Supplementary Table S5 (continued)

| Sample ID | Cr   |        |                | Fe     |        |                | Mn   |        |                | Ni    |        |                | Pb   |        |                | Zn   |        |                |
|-----------|------|--------|----------------|--------|--------|----------------|------|--------|----------------|-------|--------|----------------|------|--------|----------------|------|--------|----------------|
|           | pXRF | ICP-MS | Corrected pXRF | pXRF   | ICP-MS | Corrected pXRF | pXRF | ICP-MS | Corrected pXRF | pXRF  | ICP-MS | Corrected pXRF | pXRF | ICP-MS | Corrected pXRF | pXRF | ICP-MS | Corrected pXRF |
| NBWSL N01 | 528  | 40     | 368            | 11153  | 3568   | 6760           | 856  | 78     | 354            | 831   | 357    | 602            | 39   | 2      | 38             | 739  | 399    | 451            |
| NBWSL N02 | 411  | 211    | 286            | 16178  | 16778  | 9805           | 683  | 322    | 283            | 2050  | 2222   | 1485           | 50   | 5      | 48             | 1231 | 911    | 751            |
| NBW02 01  | 350  | 61     | 244            | 8275   | 5556   | 5015           | 650  | 103    | 269            | 467   | 478    | 338            | 39   | 4      | 38             | 564  | 456    | 344            |
| NBW02 02  | 1636 | 289    | 1140           | 75117  | 25333  | 45528          | 1839 | 444    | 760            | 6439  | 2778   | 4666           | 41   | 12     | 39             | 1231 | 700    | 751            |
| NBW03     | 1036 | 956    | 722            | 58328  | 36444  | 35352          | 1422 | 667    | 588            | 6483  | 4667   | 4698           | 328  | 411    | 317            | 1442 | 933    | 880            |
| NBW04     | 2561 | 3000   | 1784           | 131397 | 68111  | 79640          | 2850 | 1333   | 1178           | 8853  | 6556   | 6415           | 37   | 21     | 36             | 3228 | 2444   | 1971           |
| NBW05     | 931  | 311    | 648            | 43381  | 24000  | 26293          | 1289 | 456    | 533            | 4836  | 3333   | 3504           | 44   | 13     | 43             | 1728 | 1222   | 1055           |
| NBW06     | 1608 | 522    | 1120           | 78389  | 34778  | 47512          | 1786 | 611    | 739            | 9267  | 5000   | 6715           | 44   | 32     | 43             | 1494 | 933    | 913            |
| NBW_07    | 1925 | 556    | 1341           | 102839 | 42000  | 62331          | 2100 | 733    | 868            | 11872 | 6222   | 8603           | 61   | 16     | 59             | 1497 | 856    | 914            |
| NBW08     | 350  | 38     | 244            | 9783   | 5333   | 5930           | 742  | 84     | 307            | 228   | 211    | 165            | 33   | 8      | 32             | 1000 | 656    | 611            |
| NBW09     | 314  | 9      | 219            | 2044   | 1222   | 1239           | 667  | 22     | 276            | 0     | 36     | 0              | 33   | 1      | 32             | 692  | 456    | 422            |
| NBW10     | 494  | 133    | 344            | 15372  | 10444  | 9317           | 839  | 167    | 347            | 1775  | 1333   | 1286           | 0    | 4      | 0              | 975  | 611    | 595            |
| NBW11     | 417  | 50     | 290            | 10356  | 5556   | 6277           | 814  | 104    | 337            | 478   | 344    | 346            | 44   | 3      | 43             | 747  | 489    | 456            |
| NBW12     | 350  | 29     | 244            | 5314   | 2556   | 3221           | 692  | 46     | 286            | 292   | 211    | 211            | 33   | 2      | 32             | 603  | 411    | 368            |
| NBW13     | 1903 | 1222   | 1325           | 105339 | 87222  | 63846          | 2039 | 1556   | 843            | 12022 | 12000  | 8711           | 56   | 20     | 54             | 2144 | 1889   | 1309           |
| NBW14     | 289  | 7      | 201            | 1686   | 989    | 1022           | 653  | 17     | 270            | 0     | 22     | 0              | 0    | 7      | 0              | 272  | 178    | 166            |

**Supplementary Table S6.** Concentrations ( $\mu\text{g}/\text{m}^2$ ) of dust wipes for the Thio case study ( $n = **$ ). Uncorrected pXRF and ICP-MS columns contain the concentrations obtained using these two methods. Additionally, the Corrected pXRF column contains concentrations calculated using the equations derived from linear correlations for each trace metal.

| Sample ID | Cr   |        |                | Fe     |        |                | Mn   |        |                | Ni   |        |                | Pb   |        |                | Zn    |        |                |
|-----------|------|--------|----------------|--------|--------|----------------|------|--------|----------------|------|--------|----------------|------|--------|----------------|-------|--------|----------------|
|           | pXRF | ICP-MS | Corrected pXRF | pXRF   | ICP-MS | Corrected pXRF | pXRF | ICP-MS | Corrected pXRF | pXRF | ICP-MS | Corrected pXRF | pXRF | ICP-MS | Corrected pXRF | pXRF  | ICP-MS | Corrected pXRF |
| E1        | 5429 | 810    | 910            | 231595 | 57143  | 66676          | 2952 | 952    | 1464           | 5381 | 4667   | 4233           | 690  | 162    | 177            | 12357 | 5333   | 6303           |
| E2        | 2095 |        | 351            | 19833  |        | 5710           | 1405 |        | 696            | <LOD |        | -              | 429  |        | 110            | 9071  |        | 4627           |
| E3        | 722  |        | 121            | 11500  |        | 3311           | 578  |        | 286            | <LOD |        | -              | 267  |        | 68             | 6111  |        | 3117           |
| E4        | 5000 |        | 839            | 12478  |        | 3592           | 822  |        | 408            | <LOD |        | -              | 200  |        | 51             | 4278  |        | 2182           |
| E5        | 900  |        | 151            | 11200  |        | 3224           | 589  |        | 292            | <LOD |        | -              | 207  |        | 53             | 4822  |        | 2460           |
| E6        | 1222 | 284    | 205            | 37322  | 12000  | 10745          | 833  | 267    | 413            | 652  | 889    |                | 256  | 7      | 66             | 5500  | 1911   | 2806           |
| E7        | 1100 |        | 184            | 28833  |        | 8301           | 578  |        | 286            | <LOD |        | -              | 256  |        | 66             | 6889  |        | 3514           |
| E8        | 532  | 78     | 89             | 54961  | 11039  | 15823          | 529  | 208    | 262            | 351  | 338    |                | 95   | 10     | 24             | 5737  | 1948   | 2969           |
| E9        | 672  | 211    | 113            | 79122  | 19222  | 22779          | 611  | 322    | 303            | 1881 | 1333   |                | 94   | 24     | 24             | 2764  | 1222   | 1410           |
| E10       | 322  | 31     | 54             | 15381  | 3000   | 4428           | 239  | 48     | 118            | 306  | 244    |                | 58   | 4      | 15             | 1311  | 567    | 669            |
| E58       | 217  |        | 36             | 7436   |        | 2141           | 156  |        | 77             | <LOD |        | -              | 50   |        | 13             | 1297  |        | 662            |
| E59       | 180  |        | 30             | 5786   |        | 1666           | 138  |        | 69             | <LOD |        | -              | 38   |        | 10             | 1078  |        | 550            |
| E60       | 2385 | 513    | 400            | 318355 | 104605 | 91654          | 2632 | 1118   | 1305           | 592  | 1447   |                | 345  | 46     | 89             | 25773 | 15132  | 13147          |
| E61       | 3273 |        | 549            | 183914 |        | 52949          | 3059 |        | 1517           | <LOD |        | -              | 329  |        | 84             | 7566  |        | 3859           |
| E62       | 496  |        | 83             | 18612  |        | 5358           | 208  |        | 103            | <LOD |        | -              | 62   |        | 16             | 1430  |        | 729            |
| E63       | 2891 | 1034   | 485            | 192931 | 63678  | 55545          | 1805 | 1057   | 895            | 1667 | 2000   |                | 109  | 16     | 28             | 4063  | 1931   | 2073           |
| E88       | 227  |        | 38             | 12862  |        | 3703           | 23   |        | 11             | <LOD |        | -              | 132  |        | 34             | 2540  |        | 1296           |
| E89       | 415  |        | 70             | 54099  |        | 15575          | 48   |        | 24             | <LOD |        | -              | 228  |        | 59             | 3353  |        | 1711           |
| E90       | 89   |        | 15             | 12598  |        | 3627           | 36   |        | 18             | <LOD |        | -              | 179  |        | 46             | 2420  |        | 1234           |
| E91       | 244  |        | 41             | 31176  |        | 8976           | 31   |        | 15             | <LOD |        | -              | 178  |        | 46             | 2717  |        | 1386           |
| E92       | 63   |        | 11             | 10044  |        | 2282           | 25   |        | 12             | <LOD |        | -              | 119  |        | 31             | 1009  |        | 515            |
| E93       | 135  |        | 23             | 5905   |        | 1700           | 54   |        | 27             | <LOD |        | -              | 297  |        | 76             | 3000  |        | 1530           |
| E94       | 679  |        | 114            | 21537  |        | 6201           | 360  |        | 179            | <LOD |        | -              | 173  |        | 44             | 3989  |        | 2035           |

**Supplementary Table S6 (continued).** Dust wipes sampled indoors are indicated in bold. An asterisk (\*) next to Pb loading in homes sampled indoors denotes those exceeding the 2021 United States Environmental Protection Agency's Dust Lead Clearance Levels (DLCL) floor standards of 10  $\mu\text{g}/\text{ft}^2$  (108  $\mu\text{g}/\text{m}^2$ ) <sup>1</sup>. Samples with matching number ending *e* indicate collected outdoors while those with a label ending *i* indicate that were collected indoors.

| Sample ID       | Cr   |        |                | Fe    |        |                | Mn   |        |                | Ni   |        |                | Pb   |        |                | Zn    |        |                |
|-----------------|------|--------|----------------|-------|--------|----------------|------|--------|----------------|------|--------|----------------|------|--------|----------------|-------|--------|----------------|
|                 | pXRF | ICP-MS | Corrected pXRF | pXRF  | ICP-MS | Corrected pXRF | pXRF | ICP-MS | Corrected pXRF | pXRF | ICP-MS | Corrected pXRF | pXRF | ICP-MS | Corrected pXRF | pXRF  | ICP-MS | Corrected pXRF |
| E95             | 164  |        | 28             | 46128 |        | 13280          | 38   |        | 19             | <LOD |        | -              | 160  |        | 41             | 2227  |        | 1136           |
| E96             | 310  |        | 52             | 35140 |        | 10117          | 205  |        | 102            | <LOD |        | -              | 95   |        | 24             | 2630  |        | 1342           |
| E97             | 627  |        | 105            | 57554 |        | 16570          | 31   |        | 15             | <LOD |        | -              | 193  |        | 50             | 6966  |        | 3553           |
| E31-01-e        | 694  |        | 116            | 694   |        | 200            | 278  |        | 138            | <LOD |        | -              | 1250 |        | 321            | 17083 |        | 8714           |
| E31-02-e        | 139  |        | 23             | 6914  |        | 1991           | 11   |        | 6              | <LOD |        | -              | 72   |        | 19             | 1597  |        | 815            |
| <b>E31-01-i</b> | 175  |        | 29             | 28    |        | 8              | 83   |        | 41             | <LOD |        | -              | 72   |        | <b>19</b>      | 958   |        | 489            |
| <b>E31-02-i</b> | 456  |        | 77             | 27569 |        | 7937           | 313  |        | 155            | <LOD |        | -              | 138  |        | <b>35</b>      | 2775  |        | 1416           |
| E32-01-e        | 394  |        | 66             | 456   |        | 131            | 144  |        | 71             | <LOD |        | -              | 97   |        | 25             | 2938  |        | 1498           |
| E32-02-e        | 28   |        | 5              | 28    |        | 8              | 11   |        | 6              | <LOD |        | -              | 44   |        | 11             | 289   |        | 147            |
| E33-01-e        | 214  |        | 36             | 464   |        | 134            | 11   |        | 6              | <LOD |        | -              | 64   |        | 16             | 1256  |        | 640            |
| E33-02-e        | 214  |        | 36             | 464   |        | 134            | 11   |        | 6              | <LOD |        | -              | 25   |        | 6              | 158   |        | 81             |
| E34-01-e        | 97   |        | 16             | 511   |        | 147            | 11   |        | 6              | <LOD |        | -              | 53   |        | 14             | 1100  |        | 561            |
| E34-02-e        | 28   |        | 5              | 8600  |        | 2476           | 11   |        | 6              | <LOD |        | -              | 28   |        | 7              | 294   |        | 150            |
| E35-01-e        | 61   |        | 10             | 28    |        | 8              | 11   |        | 6              | <LOD |        | -              | 58   |        | 15             | 750   |        | 383            |
| E35-02-e        | 388  |        | 65             | 1950  |        | 561            | 100  |        | 50             | <LOD |        | -              | 400  |        | 103            | 5900  |        | 3010           |
| <b>E35-01-i</b> | 850  |        | 143            | 250   |        | 72             | 100  |        | 50             | <LOD |        | -              | 500  |        | <b>128*</b>    | 6750  |        | 3443           |
| <b>E35-02-i</b> | 1744 | 223    | 292            | 71456 | 20750  | 20572          | 1031 | 425    | 511            | 1213 | 1125   | 954            | 131  | 30     | <b>34</b>      | 2888  | 1975   | 1473           |
| E36-01-e        | 331  |        | 56             | 1275  |        | 367            | 100  |        | 50             | <LOD |        | -              | 400  |        | 32             | 5900  |        | 1556           |
| E36-02-e        | 397  | 63     | 67             | 18203 | 6667   | 5421           | 186  | 76     | 92             | 367  | 378    | 288            | 69   | 8      | 18             | 1389  | 733    | 708            |
| E37-01-e        | 178  |        | 30             | 342   |        | 98             | 93   |        | 46             | <LOD |        | -              | 64   |        | 16             | 1094  |        | 558            |
| E37-02-e        | 2086 | 500    | 350            | 97322 | 29556  | 28019          | 906  | 544    | 499            | 2442 | 2333   | 1921           | 61   | 13     | 16             | 1311  | 689    | 669            |
| E38-01-e        | 164  |        | 27             | 28    |        | 8              | 60   |        | 30             | <LOD |        | -              | 67   |        | 17             | 1253  |        | 639            |
| E39-01-e        | 156  |        | 26             | 28    |        | 8              | 117  |        | 58             | <LOD |        | -              | 61   |        | 16             | 1364  |        | 696            |
| E39-02-e        | 28   |        | 5              | 6436  |        | 1853           | 11   |        | 6              | <LOD |        | -              | 33   |        | 9              | 281   |        | 143            |
| E40-01-e        | 231  |        | 39             | 1711  |        | 493            | 100  |        | 50             | <LOD |        | -              | 50   |        | 13             | 1064  |        | 543            |
| E40-02-e        | 1097 | 233    | 184            | 52086 | 16778  | 14996          | 411  | 267    | 204            | 1442 | 1222   | 1134           | 56   | 2      | 14             | 1331  | 789    | 679            |
| E41-01-e        | 172  |        | 29             | 28    |        | 8              | 74   |        | 37             | <LOD |        | -              | 61   |        | 16             | 1169  |        | 597            |

**Supplementary Table S6 (continued).** Dust wipes sampled indoors are indicated in bold. An asterisk (\*) next to Pb loading in homes sampled indoors denotes those exceeding the 2021 United States Environmental Protection Agency's Dust Lead Clearance Levels (DLCL) floor standards of 10 µg/ft<sup>2</sup> (108 µg/m<sup>2</sup>) <sup>1</sup>. Samples with matching number ending *e* indicate collected outdoors while those with a label ending *i* indicate that were collected indoors.

| Sample ID       | Cr   |        |                | Fe     |        |                | Mn   |        |                | Ni   |        |                | Pb   |        |                |      | Zn     |                |
|-----------------|------|--------|----------------|--------|--------|----------------|------|--------|----------------|------|--------|----------------|------|--------|----------------|------|--------|----------------|
|                 | pXRF | ICP-MS | Corrected pXRF | pXRF   | ICP-MS | Corrected pXRF | pXRF | ICP-MS | Corrected pXRF | pXRF | ICP-MS | Corrected pXRF | pXRF | ICP-MS | Corrected pXRF | pXRF | ICP-MS | Corrected pXRF |
| E41-02-e        | 317  |        | 53             | 4281   |        | 1233           | 25   |        | 12             | <LOD |        | -              | 125  |        | 32             | 2225 |        | 1135           |
| E42-01-e        | 388  |        | 65             | 2900   |        | 835            | 300  |        | 149            | <LOD |        | -              | 163  |        | 42             | 2356 |        | 1202           |
| E42-02-e        | 150  |        | 25             | 2313   |        | 666            | 25   |        | 12             | <LOD |        | -              | 88   |        | 22             | 694  |        | 354            |
| <b>E42-01-i</b> | 356  |        | 60             | 1350   |        | 389            | 125  |        | 62             | <LOD |        | -              | 108  |        | <b>28</b>      | 2888 |        | 1473           |
| <b>E42-02-i</b> | 638  |        | 107            | 6006   |        | 1729           | 388  |        | 192            | <LOD |        | -              | 133  |        | <b>34</b>      | 1538 |        | 784            |
| E43-01-e        | 363  |        | 61             | 1900   |        | 547            | 163  |        | 81             | <LOD |        | -              | 133  |        | 34             | 2725 |        | 1390           |
| E43-02-e        | 850  | 133    | 143            | 35181  | 9333   | 10128          | 206  | 111    | 102            | 664  | 578    | 522            | 64   | 4      | 16             | 1347 | 656    | 687            |
| E44-01-e        | 167  |        | 28             | 700    |        | 202            | 78   |        | 39             | <LOD |        | -              | 61   |        | 16             | 906  |        | 462            |
| E44-02-e        | 344  |        | 58             | 25647  |        | 7384           | 93   |        | 46             | <LOD |        | -              | 72   |        | 19             | 1681 |        | 857            |
| <b>E44-01-i</b> | 172  |        | 29             | 394    |        | 114            | 89   |        | 44             | <LOD |        | -              | 50   |        | <b>13</b>      | 1000 |        | 510            |
| <b>E44-02-i</b> | 119  |        | 20             | 9475   |        | 2728           | 25   |        | 12             | <LOD |        | -              | 150  |        | <b>38</b>      | 1669 |        | 851            |
| E45-01-e        | 375  |        | 63             | 1675   |        | 482            | 188  |        | 93             | <LOD |        | -              | 133  |        | 34             | 3078 |        | 1549           |
| E45-02-e        | 275  | 40     | 46             | 7975   | 2778   | 2296           | 56   | 37     | 28             | 78   | 189    | 61             | 64   | 3      | 16             | 700  | 578    | 357            |
| <b>E45-01-i</b> | 186  |        | 31             | 1133   |        | 326            | 111  |        | 55             | <LOD |        | -              | 56   |        | <b>14</b>      | 1478 |        | 754            |
| <b>E45-02-i</b> | 475  | 325    | 80             | 44025  | 34250  | 12675          | 175  | 525    | 87             | 969  | 2225   | 762            | 306  | 375    | <b>79</b>      | 5188 | 5500   | 2646           |
| E46-01-e        | 1300 |        | 55             | 2500   |        | 180            | 1400 |        | 174            | <LOD |        | -              | 575  |        | 37             | 9700 |        | 1237           |
| E46-02-e        | 933  |        | 157            | 11200  |        | 3224           | 100  |        | 50             | <LOD |        | -              | 144  |        | 122            | 7175 |        | 3660           |
| E47-01-e        | 1500 |        | 252            | 5250   |        | 1511           | 900  |        | 446            | <LOD |        | -              | 475  |        | 122            | 9500 |        | 4846           |
| E47-02-e        | 1981 | 450    | 332            | 106250 | 32750  | 30589          | 1138 | 600    | 564            | 4313 | 4000   | 3392           | 131  | 21     | 34             | 7413 | 2175   | 3781           |
| E48-01-e        | 375  |        | 63             | 63     |        | 18             | 192  |        | 95             | <LOD |        | -              | 113  |        | 29             | 2656 |        | 1335           |
| E48-02-e        | 122  |        | 20             | 4906   |        | 1412           | 11   |        | 6              | <LOD |        | -              | 67   |        | 17             | 1075 |        | 548            |
| E49-01-e        | 114  |        | 19             | 467    |        | 134            | 11   |        | 6              | <LOD |        | -              | 61   |        | 16             | 989  |        | 504            |
| E49-02-e        | 719  | 100    | 121            | 18750  | 6500   | 5398           | 400  | 108    | 198            | 342  | 600    | 269            | 131  | 4      | 34             | 2625 | 1275   | 1339           |
| E50-01-e        | 319  |        | 53             | 63     |        | 18             | 133  |        | 66             | <LOD |        | -              | 125  |        | 32             | 2313 |        | 1180           |
| E50-02-e        | 1431 | 375    | 240            | 66150  | 26250  | 19045          | 650  | 450    | 322            | 1100 | 1400   | 865            | 438  | 400    | 112            | 5263 | 2750   | 2684           |
| <b>E50-01-i</b> | 356  |        | 60             | 63     |        | 18             | 192  |        | 95             | <LOD |        | -              | 117  |        | <b>30</b>      | 2269 |        | 1157           |



**Supplementary Table S6 (continued).** Dust wipes sampled indoors are indicated in bold. An asterisk (\*) next to Pb loading in homes sampled indoors denotes those exceeding the 2021 United States Environmental Protection Agency's Dust Lead Clearance Levels (DLCL) floor standards of 10 µg/ft<sup>2</sup> (108 µg/m<sup>2</sup>) <sup>1</sup>. Samples with matching number ending *e* indicate collected outdoors while those with a label ending *i* indicate that were collected indoors.

| Sample ID       | Cr   |        |                | Fe      |        |                | Mn   |          |                | Ni   |        |                | Pb   |        |                | Zn    |        |                |
|-----------------|------|--------|----------------|---------|--------|----------------|------|----------|----------------|------|--------|----------------|------|--------|----------------|-------|--------|----------------|
|                 | pXRF | ICP-MS | Corrected pXRF | pXRF    | ICP-MS | Corrected pXRF | pXRF | ICP-MS   | Corrected pXRF | pXRF | ICP-MS | Corrected pXRF | pXRF | ICP-MS | Corrected pXRF | pXRF  | ICP-MS | Corrected pXRF |
| E51-01-e        | 172  |        | <b>29</b>      | 356     |        | <b>102</b>     | 83   |          | <b>41</b>      | <LOD |        | -              | 53   |        | 14             | 919   |        | 469            |
| E51-02-e        | 558  | 244    | 94             | 37383   | 24778  | 10763          | 136  | 356      | 67             | 525  | 1044   | 413            | 75   | 58     | 19             | 872   | 700    | 445            |
| <b>E51-01-i</b> | 294  |        | 22             | 650     |        | 83             | <LOD |          | 6              | <LOD |        | -              | 119  |        | <b>14</b>      | 2275  |        | 516            |
| <b>E51-02-i</b> | 963  |        | 161            | 28263   |        | 8137           | 556  |          | 276            | <LOD |        | -              | 163  |        | <b>42</b>      | 3213  |        | 1639           |
| E52-01-e        | 331  |        | 56             | 1483    |        | 427            | 158  |          | 79             | <LOD |        | -              | 142  |        | 36             | 2125  |        | 1084           |
| E52-02-e        | 269  | 31     | 45             | 11286   | 2000   | 3249           | 156  | 44       | 77             | 244  | 111    | 192            | 69   | 5      | 18             | 822   | 578    | 419            |
| <b>E52-01-i</b> | 181  |        | 30             | #VALUE! |        | 8              | 115  |          | 57             | <LOD |        | -              | 63   |        | <b>16</b>      | 1036  |        | 529            |
| <b>E52-02-i</b> | 292  |        | 49             | 6925    |        | 1994           | 103  |          | 51             | <LOD |        | -              | 69   |        | <b>18</b>      | 1333  |        | 680            |
| E53-01-e        | 142  |        | 24             | 28      |        | 8              | 67   |          | 33             | <LOD |        | -              | 58   |        | 15             | 858   |        | 438            |
| E53-02-e        | 28   |        | 5              | 1503    |        | 433            | 11   |          | 6              | <LOD |        | -              | 37   |        | 9              | 169   |        | 86             |
| E54-01-e        | 128  |        | 21             | 28      |        | 8              | 61   |          | 30             | <LOD |        | -              | 53   |        | 14             | 1128  |        | 575            |
| E54-02-e        | 89   |        | 15             | 858     |        | 247            | 11   |          | 6              | <LOD |        | -              | 36   |        | 9              | 247   |        | 126            |
| E55-01-e        | 319  |        | 53             | 63      |        | 18             | 250  |          | 124            | <LOD |        | -              | 138  |        | 35             | 2819  |        | 1438           |
| E55-02-e        | 28   |        | 5              | 706     |        | 203            | 11   |          | 6              | <LOD |        | -              | 33   |        | 9              | 231   |        | 118            |
| E56-01-e        | 150  |        | 25             | 659     |        | 190            | 133  |          | 66             | <LOD |        | -              | 58   |        | 15             | 953   |        | 486            |
| E56-02-e        | 78   |        | 13             | 2225    |        | 641            | 11   |          | 6              | <LOD |        | -              | 44   |        | 11             | 381   |        | 194            |
| E57-01-e        | 381  |        | 64             | 2431    |        | 700            | 150  |          | 74             | <LOD |        | -              | 0    |        | 0              | 1775  |        | 905            |
| E57-02-e        | 228  | 67     | 38             | 14472   | 5556   | 4167           | 44   | 78       | 22             | 141  | 333    | 111            | 53   | 4      | 14             | 761   | 522    | 388            |
| E58-01-e        | 178  |        | 30             | 633     |        | 182            | 97   |          | 48             | <LOD |        | -              | 67   |        | 17             | 1483  |        | 757            |
| E58-02-e        | 500  | 148    | 84             | 27338   | 17000  | 7870           | 200  | 185      | 99             | 731  | 1050   | 575            | 131  | 8      | 34             | 1931  | 1750   | 985            |
| E59-01-e        | 325  |        | 55             | 63      |        | 18             | 188  |          | 93             | <LOD |        | -              | 119  |        | 30             | 2656  |        | 1355           |
| E59-02-e        | 369  |        | 62             | 6363    |        | 1832           | 192  |          | 95             | <LOD |        | -              | 125  |        | 32             | 1881  |        | 960            |
| E60-01-e        | 275  |        | 46             | 1025    |        | 295            | 25   |          | 12             | <LOD |        | -              | 125  |        | 32             | 3825  |        | 1951           |
| E60-02-e        | 4625 | 975    | 776            | 184050  | 58000  | 52988          | 1438 | 107<br>5 | 713            | 1163 | 1150   | 914            | 250  | 105    | 64             | 6863  | 4250   | 3501           |
| E61-01-e        | 381  |        | 64             | 63      |        | 18             | 242  |          | 120            | <LOD |        | -              | 119  |        | 30             | 1863  |        | 950            |
| E61-02-e        | 8725 | 610    | 1463           | 176675  | 42000  | 50865          | 2025 | 720      | 1004           | 1400 | 1400   | 1101           | 467  | 6      | 120            | 10950 | 5200   | 5586           |
| E62-01-e        | 1650 |        | 277            | 5400    |        | 1555           | 1450 |          | 719            | <LOD |        | -              | 600  |        | 154            | 8425  |        | 4928           |

**Supplementary Table S6 Continued.** Dust wipes sampled indoors are indicated in bold. An asterisk (\*) next to Pb loading in homes sampled indoors denotes those exceeding the 2021 United States Environmental Protection Agency's Dust Lead Clearance Levels (DLCL) floor standards of 10 µg/ft<sup>2</sup> (108 µg/m<sup>2</sup>) <sup>1</sup>. Samples with matching number ending *e* indicate collected outdoors while those with a label ending *i* indicate that were collected indoors.

| Sample ID       | Cr   |        |                | Fe     |        |                | Mn   |        |                | Ni    |        |                | Pb   |        |                | Zn    |        |                |
|-----------------|------|--------|----------------|--------|--------|----------------|------|--------|----------------|-------|--------|----------------|------|--------|----------------|-------|--------|----------------|
|                 | pXRF | ICP-MS | Corrected pXRF | pXRF   | ICP-MS | Corrected pXRF | pXRF | ICP-MS | Corrected pXRF | pXRF  | ICP-MS | Corrected pXRF | pXRF | ICP-MS | Corrected pXRF | pXRF  | ICP-MS | Corrected pXRF |
| E62-02-e        | 1988 |        | 333            | 14794  |        | 4259           | 25   |        | 12             | <LOD  |        | -              | 200  |        | 51             | 4988  |        | 2544           |
| <b>E62-01i</b>  | 388  |        | 65             | 63     |        | 18             | 175  |        | 87             | <LOD  |        | -              | 131  |        | <b>34</b>      | 3531  |        | 1801           |
| <b>E62-02-i</b> | 1063 |        | 178            | 35613  |        | 10253          | 450  |        | 223            | <LOD  |        | -              | 125  |        | <b>32</b>      | 3463  |        | 1766           |
| E63-01-e        | 556  |        | 93             | 5725   |        | 1648           | 225  |        | 112            | <LOD  |        | -              | 119  |        | 30             | 2069  |        | 1055           |
| E63-02-e        | 531  |        | 89             | 5319   |        | 1531           | 283  |        | 140            | <LOD  |        | -              | 125  |        | 32             | 2619  |        | 1336           |
| <b>E63-01-i</b> | 638  |        | 107            | 9375   |        | 2699           | 188  |        | 93             | <LOD  |        | -              | 119  |        | <b>30</b>      | 3113  |        | 1588           |
| <b>E63-02-i</b> | 2575 |        | 432            | 46000  |        | 13243          | 1333 |        | 661            | <LOD  |        | -              | 550  |        | <b>141*</b>    | 11950 |        | 6096           |
| E64-01-e        | 1700 |        | 285            | 4800   |        | 1382           | 900  |        | 446            | <LOD  |        | -              | 450  |        | 115            | 9725  |        | 4961           |
| E64-02-e        | 1700 | 325    | 285            | 71450  | 22750  | 20570          | 706  | 375    | 350            | 3156  | 2750   | 2483           | 94   | 14     | 24             | 2213  | 1225   | 1129           |
| <b>E64-01-i</b> | 1575 |        | 66             | 2800   |        | 202            | 1050 |        | 130            | <LOD  |        | -              | 575  |        | <b>37</b>      | 9825  |        | 1253           |
| <b>E64-02-i</b> | 6500 | 690    | 1090           | 295550 | 53000  | 85089          | 3125 | 1100   | 1549           | 11250 | 6800   | 8849           | 850  | 150    | <b>218*</b>    | 16150 | 5500   | 8238           |
| E65-01-e        | 2000 |        | 335            | 250    |        | 72             | 1400 |        | 694            | <LOD  |        | -              | 600  |        | 154            | 14200 |        | 7243           |
| E65-02-e        | 1750 | 198    | 293            | 80694  | 15250  | 23232          | 819  | 300    | 406            | 2863  | 1800   | 2252           | 113  | 4      | 29             | 3313  | 1300   | 1690           |
| E66-01-e        | 325  |        | 55             | 63     |        | 18             | 25   |        | 12             | <LOD  |        | -              | 125  |        | 32             | 3625  |        | 1849           |
| E66-02-e        | 1500 |        | 252            | 28200  |        | 8119           | 800  |        | 397            | <LOD  |        | -              | 500  |        | 128            | 18200 |        | 9284           |
| E67-02-e        | 2150 |        | 361            | 80375  |        | 23140          | 1350 |        | 669            | <LOD  |        | -              | 575  |        | 147            | 15325 |        | 7817           |
| <b>E67-02-i</b> | 275  |        | 46             | 2294   |        | 660            | 25   |        | 12             | <LOD  |        | -              | 125  |        | <b>32</b>      | 2600  |        | 1326           |
| E68-01-e        | 1400 |        | 235            | 250    |        | 72             | 100  |        | 50             | <LOD  |        | -              | 500  |        | 128            | 12000 |        | 6121           |
| E68-02-e        | 1875 |        | 314            | 15600  |        | 4491           | 1133 |        | 562            | <LOD  |        | -              | 475  |        | 122            | 10275 |        | 5241           |
| <b>E68-02-i</b> | 9325 | 2300   | 1564           | 402150 | 128000 | 115779         | 2575 | 2500   | 1277           | 4575  | 6200   | 3599           | 575  | 47     | <b>147*</b>    | 10925 | 6500   | 5573           |

**Supplementary Figure S1.** Comparison between two sample groups of trace metal distributions analysed by pXRF before the correction method was implemented: in red, 100% of samples analysed from Tsumeb (n = 53); in blue, samples analysed by pXRF from Tsumeb (19%, n = 10/53) and submitted for ICP-MS analysis. No significant differences were found between the two compared groups  $p > 0.05$  for each evaluated trace metal.

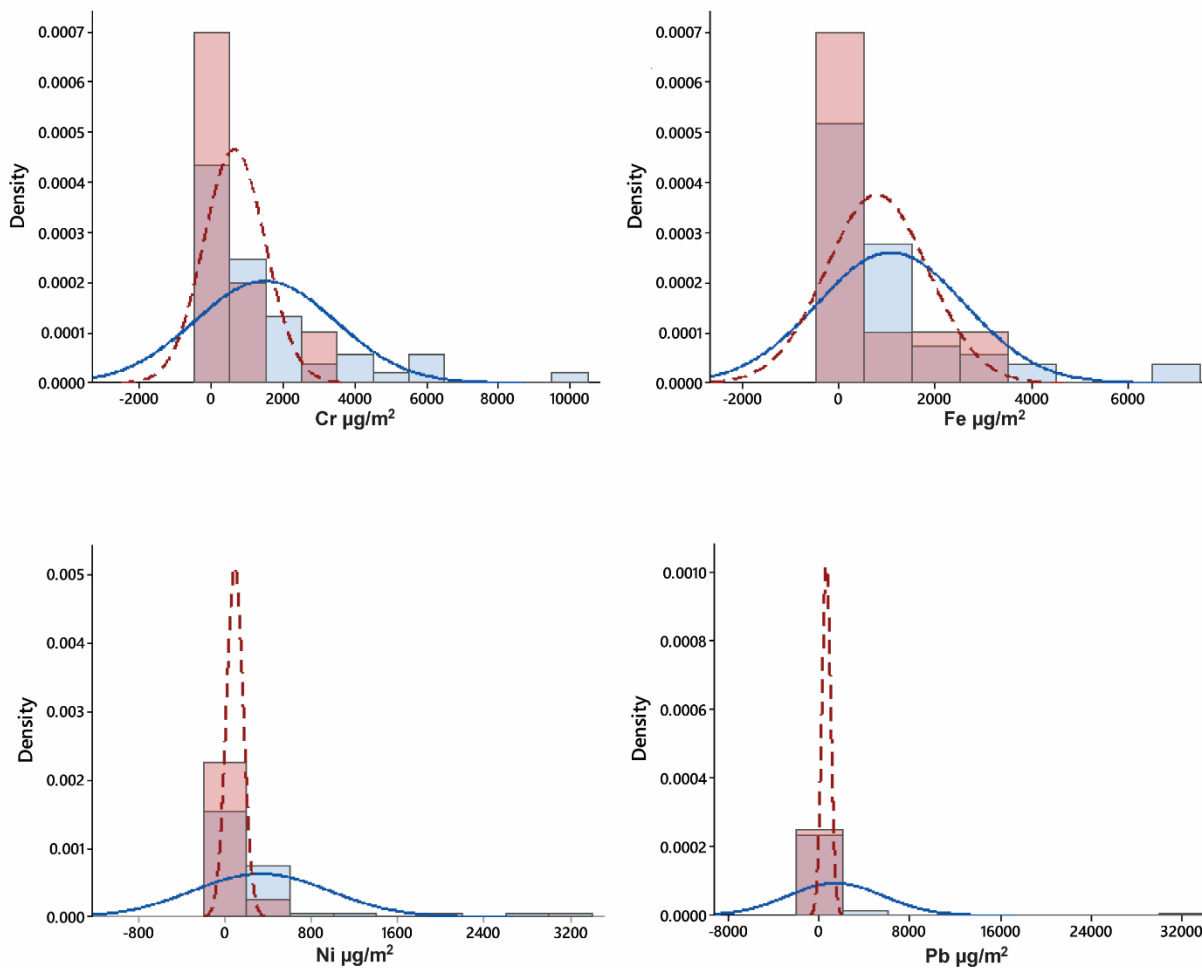

**Supplementary Figure S2.** Comparison between two sample groups of trace metal distributions analysed by pXRF before the correction method was applied: in red, 100% of samples analysed from Noumea (n = 112); in blue, samples analysed by pXRF from Noumea (31%, n = 35/112) and submitted for ICP-MS analysis. No significant differences were found between the two compared groups  $p > 0.05$  for each evaluated trace metal.

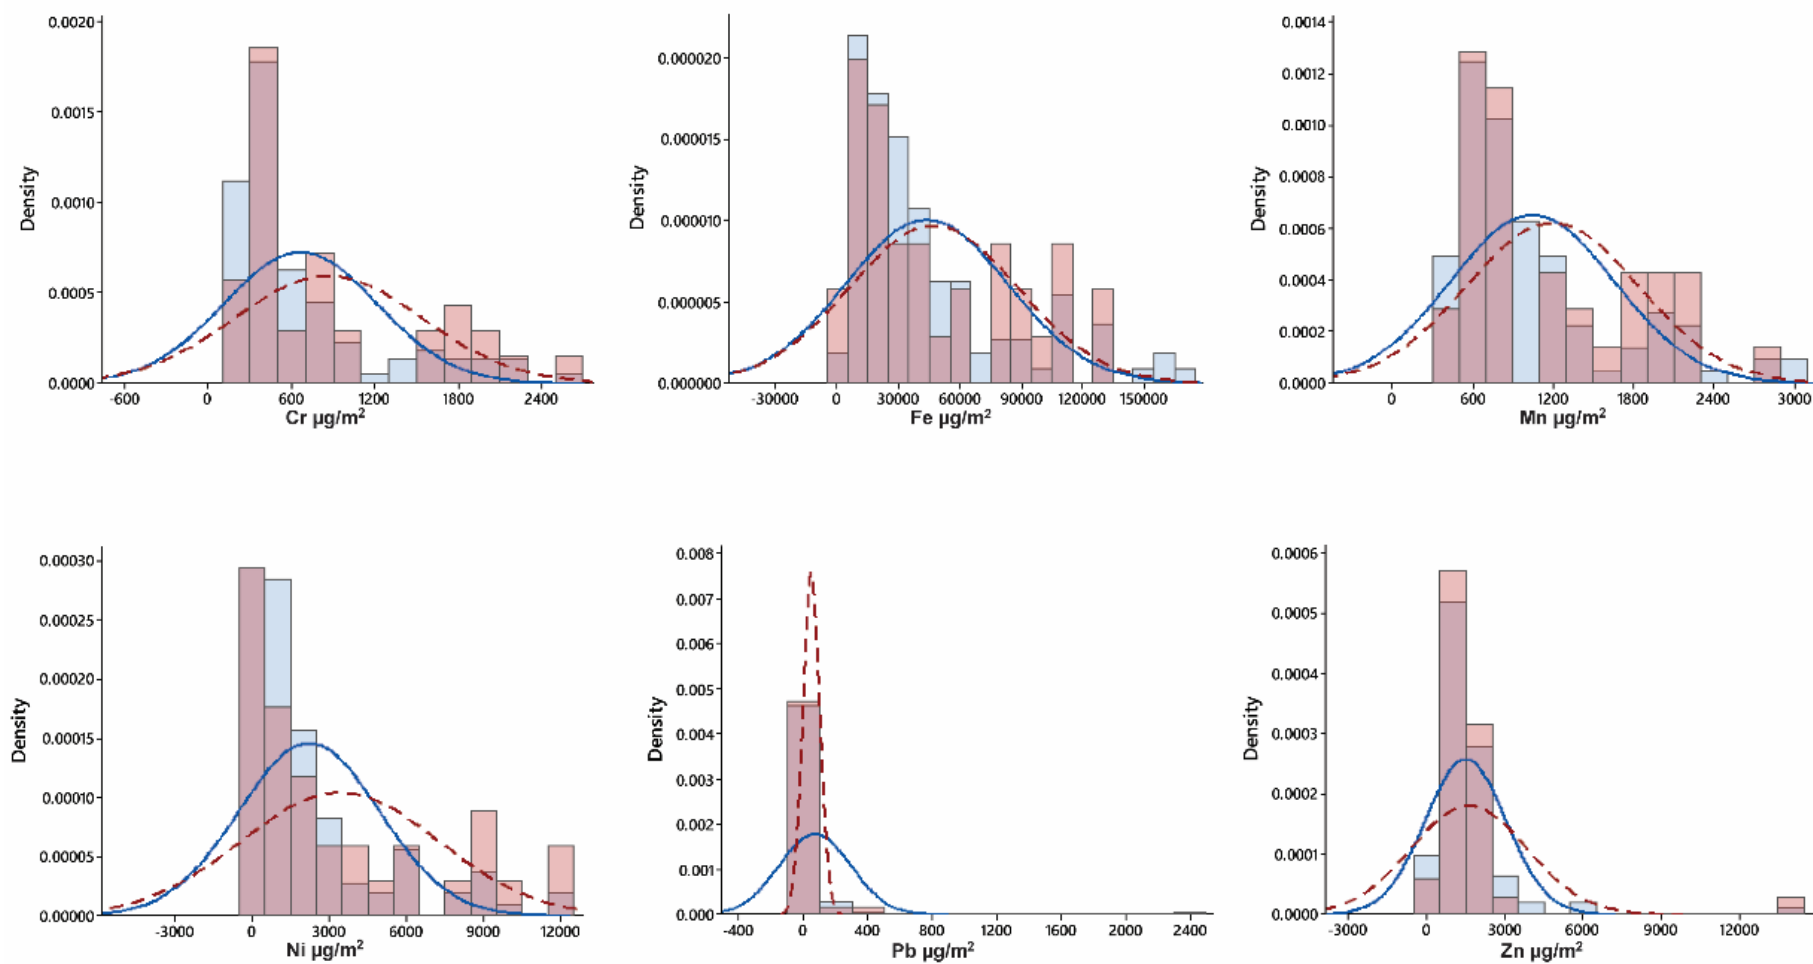

**Supplementary Figure S3.** Comparison between two sample groups of trace metal distributions analysed by pXRF before the correction method was implemented: in red, 100% of samples analysed from Thio (n = 123); in blue, samples analysed by pXRF from Thio (21%, n = 26/123) and submitted for ICP-MS analysis. No significant differences were found between the two compared groups  $p > 0.05$  for each evaluated trace metal.

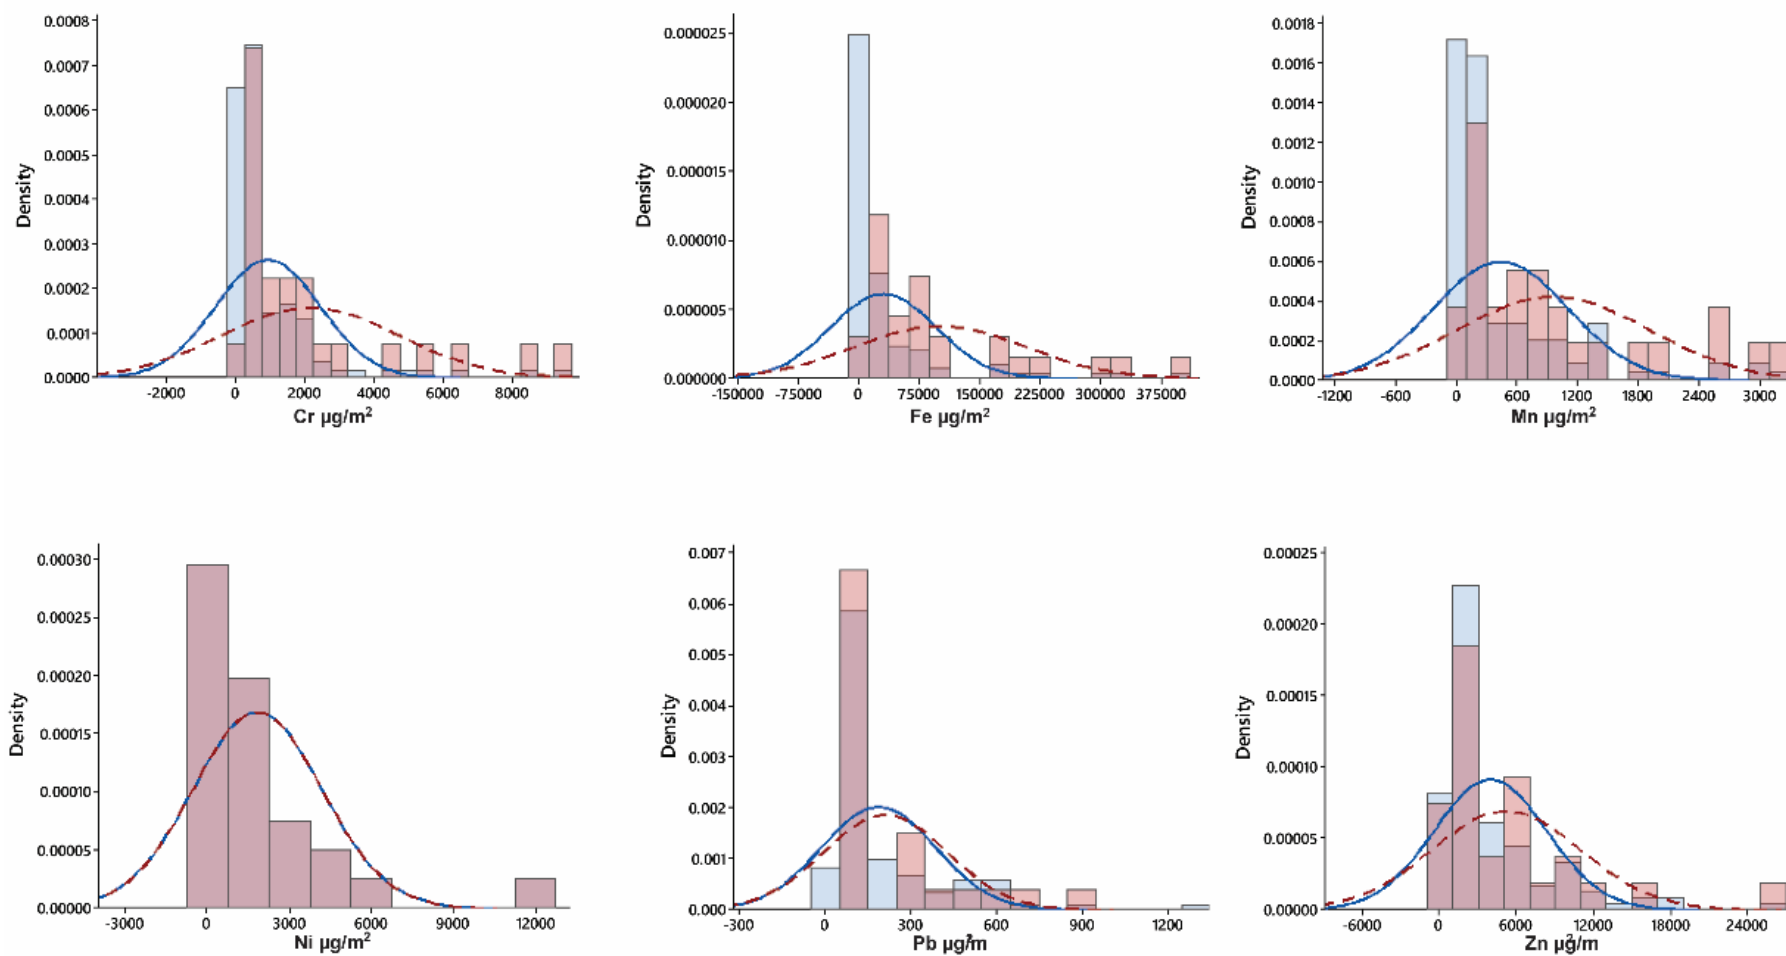

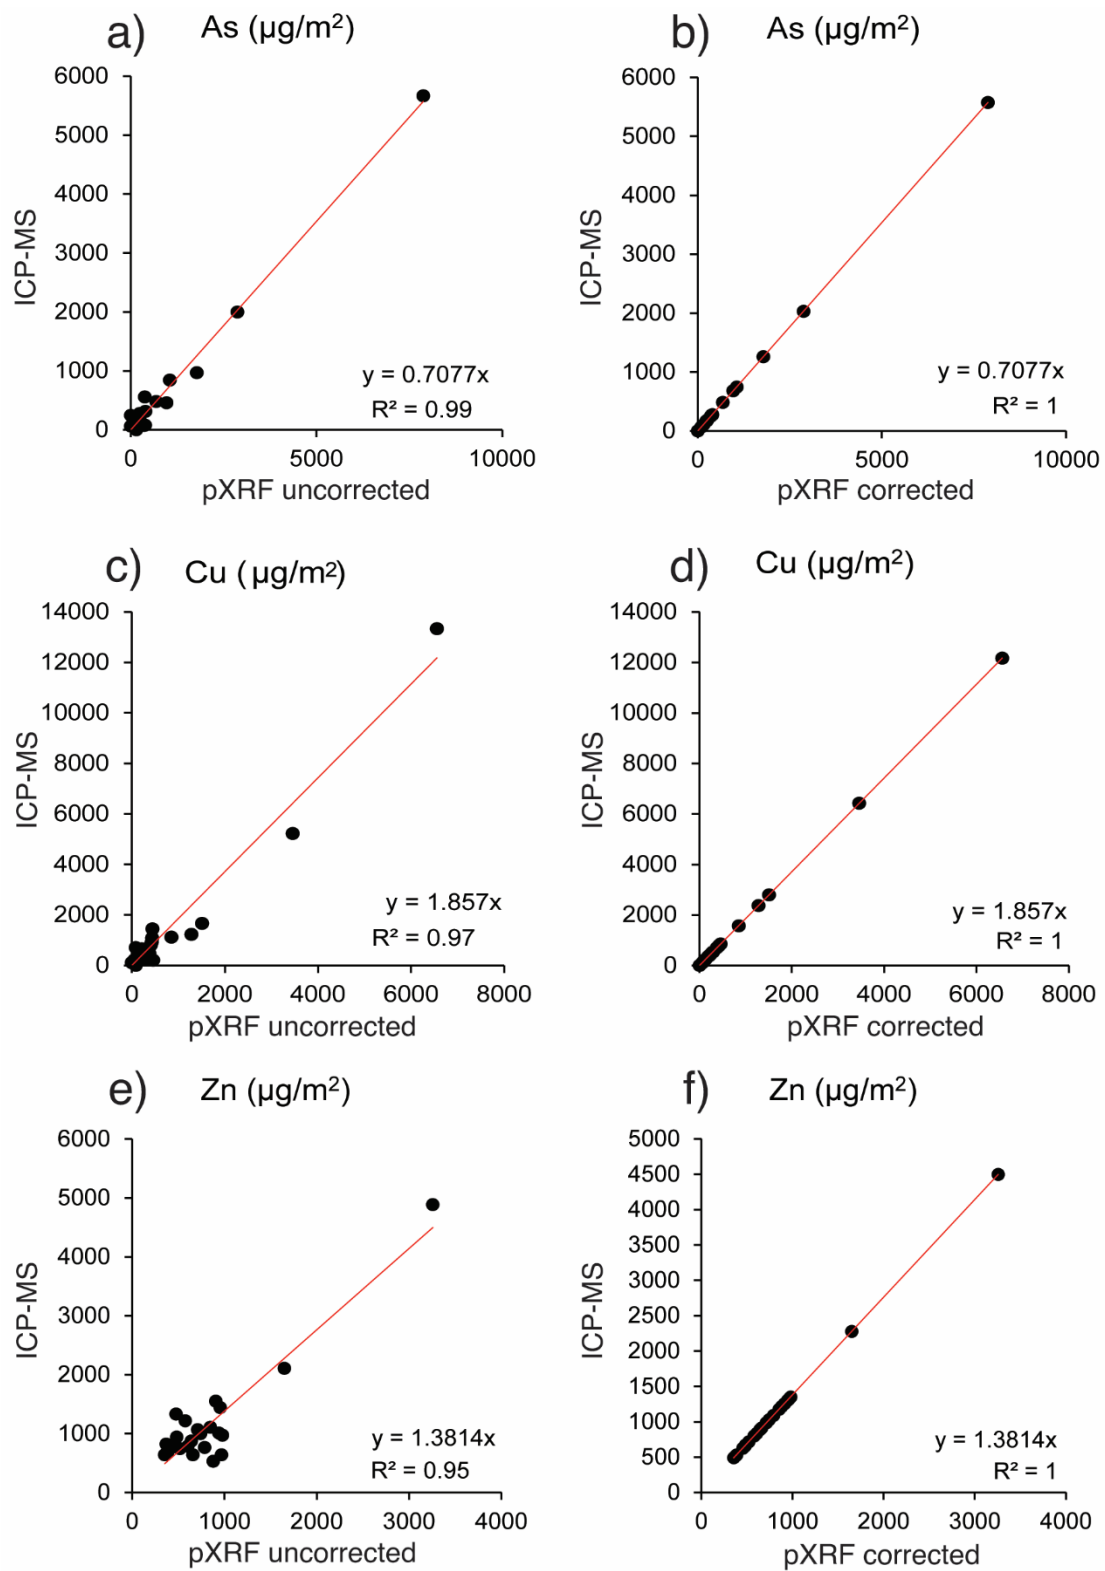

**Supplementary Figure S4.** Linear regression plots showing the adjustment or correction of As (pre (a) and post (b) correction), Cu (pre (c) and post (d) correction) and Zn (pre (e) and post (f) correction) in Tsumeb dust wipes ( $n = 25$ ).

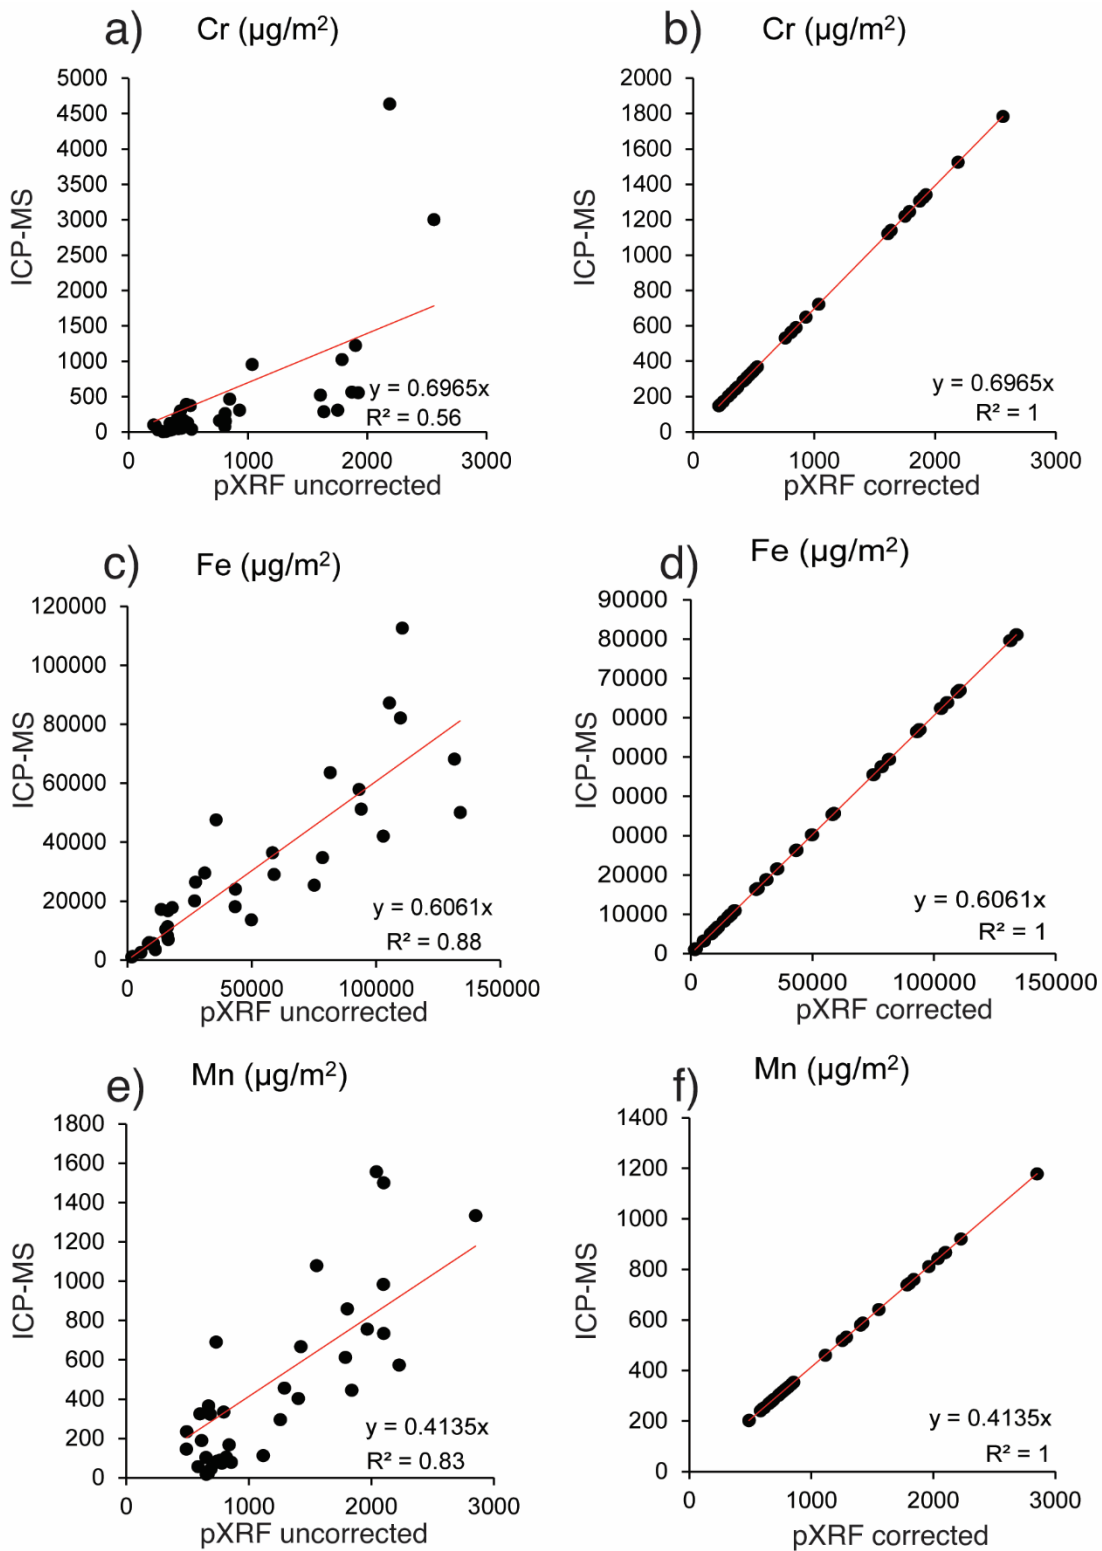

**Supplementary Figure S5.** Linear regression plots showing the adjustment or correction of Cr (pre (a) and post (b) correction), Fe (pre (c) and post (d) correction) and Mn (pre (e) and post (f) correction) in Noumea dust wipes ( $n = 35$ ).

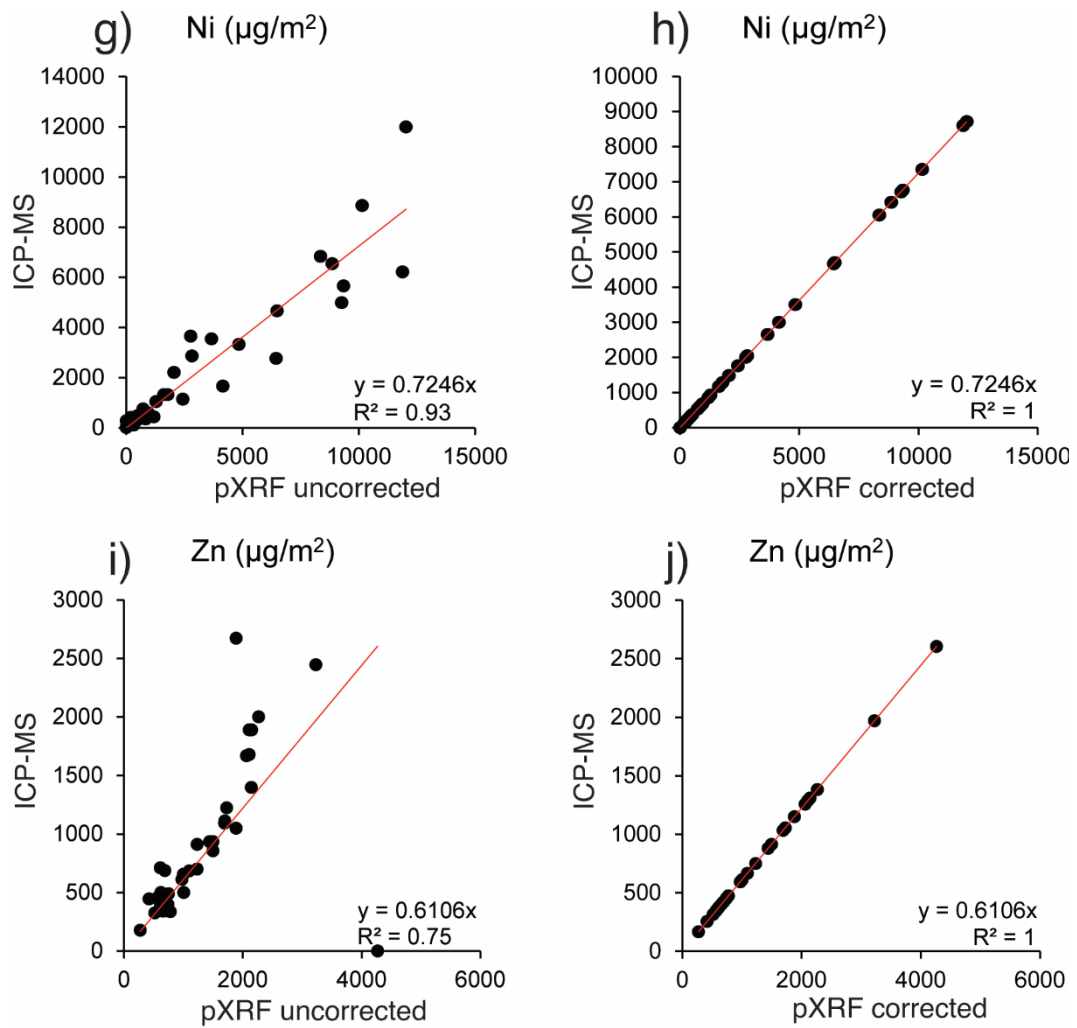

**Supplementary Figure S5 Continued.** Linear regression plots showing the adjustment or correction of Ni (pre (g) and post (h) correction), and Zn (pre (i) and post (j) correction) in Noumea dust wipes (n = 35).



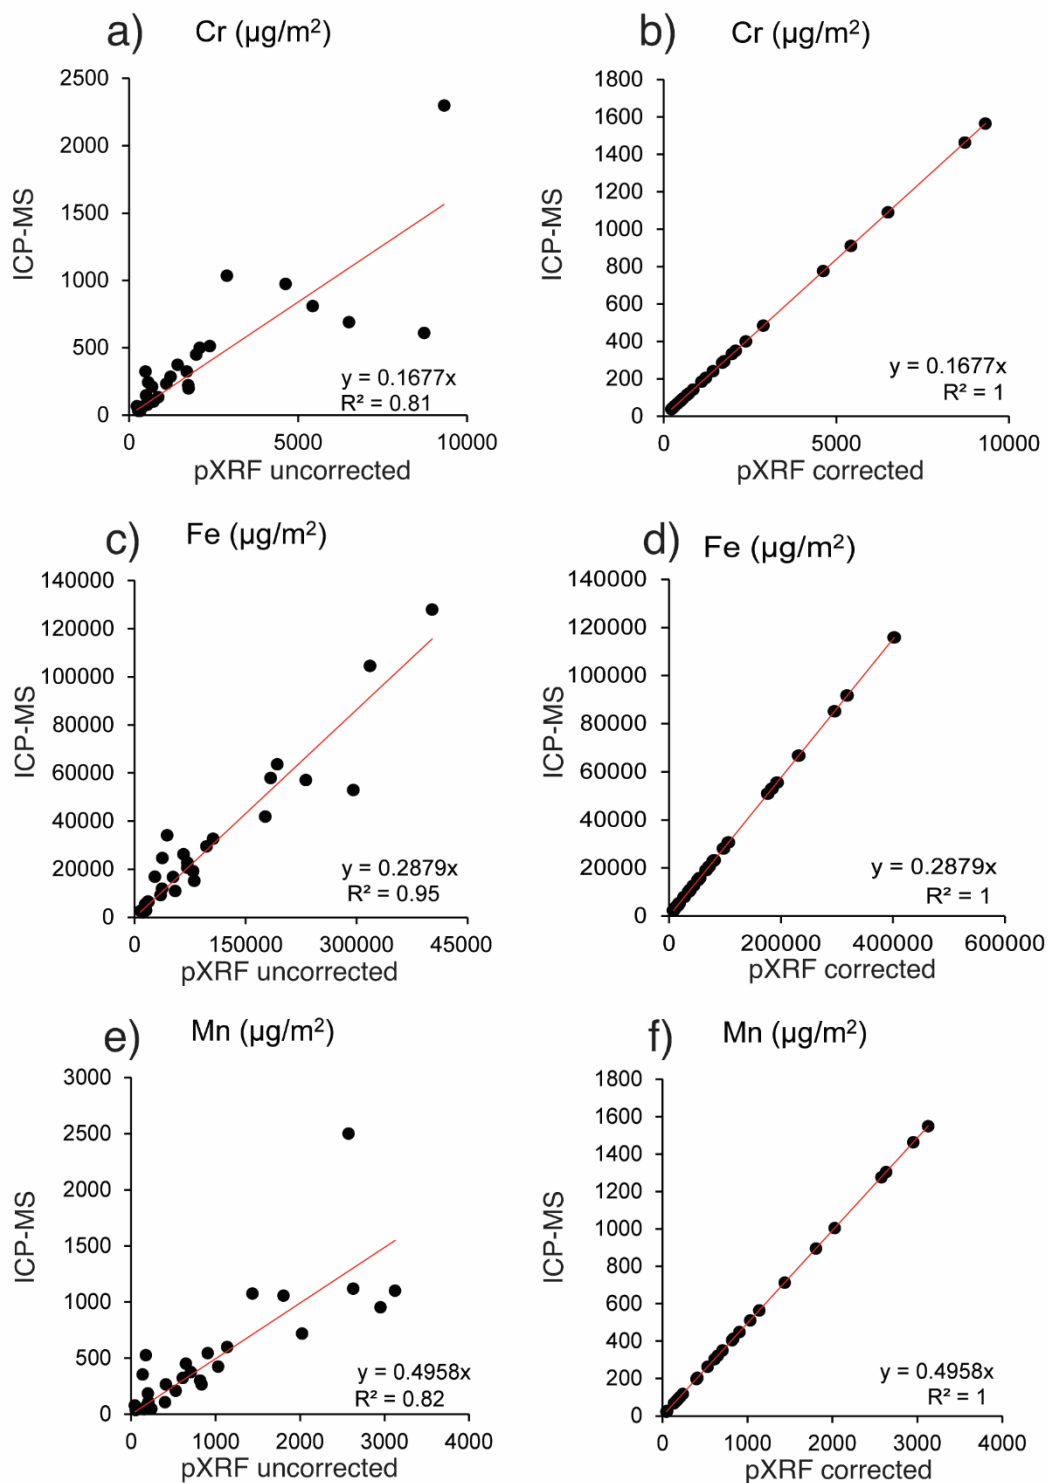

**Supplementary Figure S6.** Linear regression plots showing the adjustment or correction of Cr (pre (a) and post (b) correction), Fe (pre (c) and post (d) correction) and Mn (pre (e) and post (f) correction) in Thio dust wipes ( $n = 27$ ).

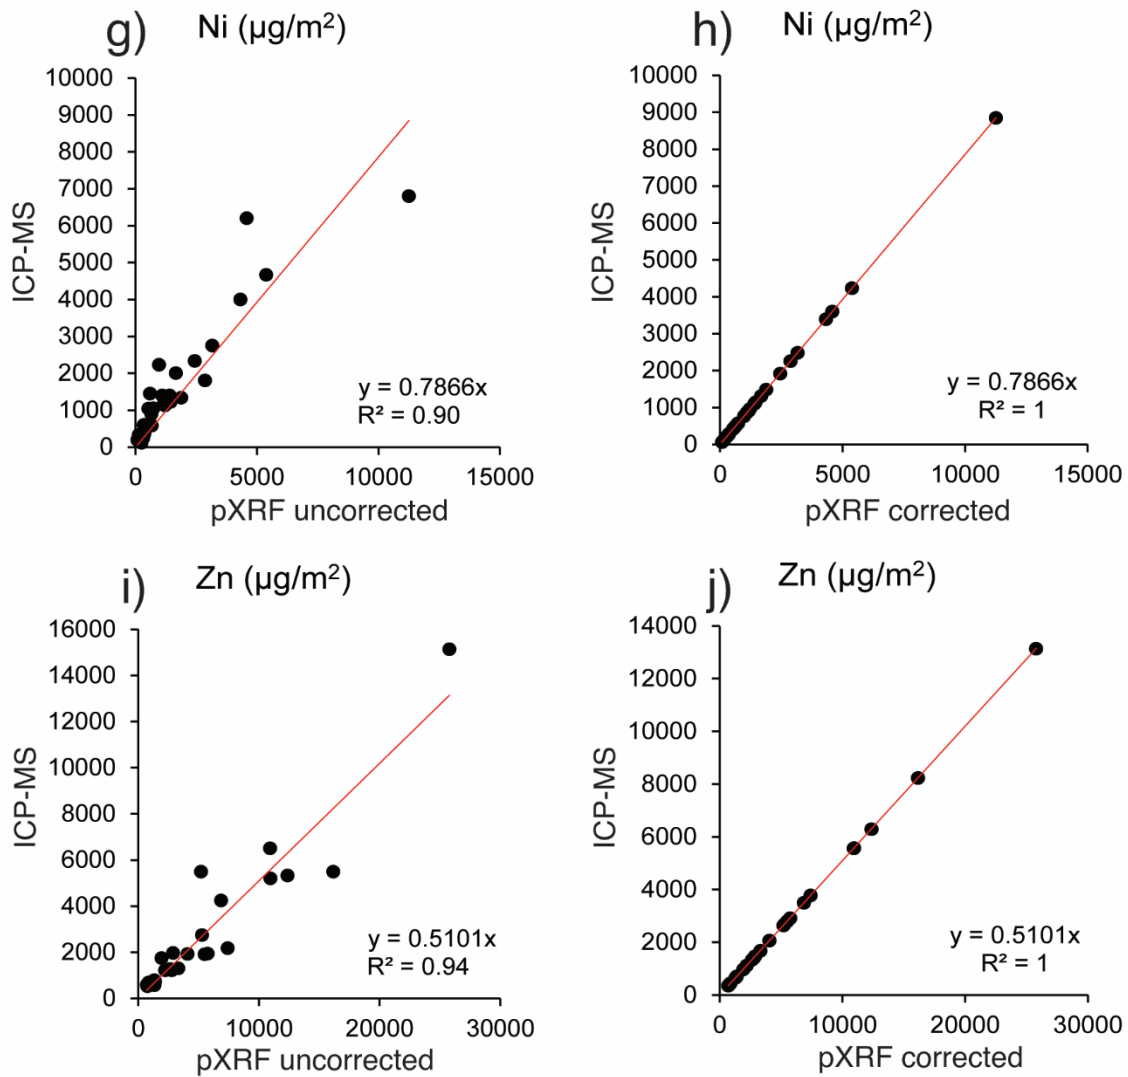

**Supplementary Figure S6 Continued.** Linear regression plots showing the adjustment or correction of Ni (pre (g) and post (h) correction), and Zn (pre (i) and post (j) correction) in Thio dust wipes (n = 27).

## References

1. US EPA. United States Environmental Protection Agency, Review of Dust-Lead Post Abatement Clearance Levels: Federal Register, 86 (4); 2021. Available from: <https://www.govinfo.gov/content/pkg/FR-2021-01-07/pdf/2020-28565.pdf>.
